# Supplementary material
Source: PubMed Central journal article supplement (PMC8207027)
Supplement: PMRJ-13-554-s001.pdf [file PMRJ-13-554-s001.pdf]

# Report for 2020 - COVID-19 Impact on Physiatrists

## Response Counts

Completion Rate:

88.3%

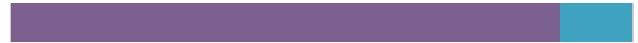

Complete

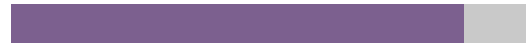

226

Partial

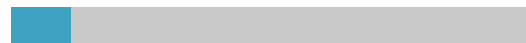

30

---

Totals: 256

1. Which of the following best describes your professional status?

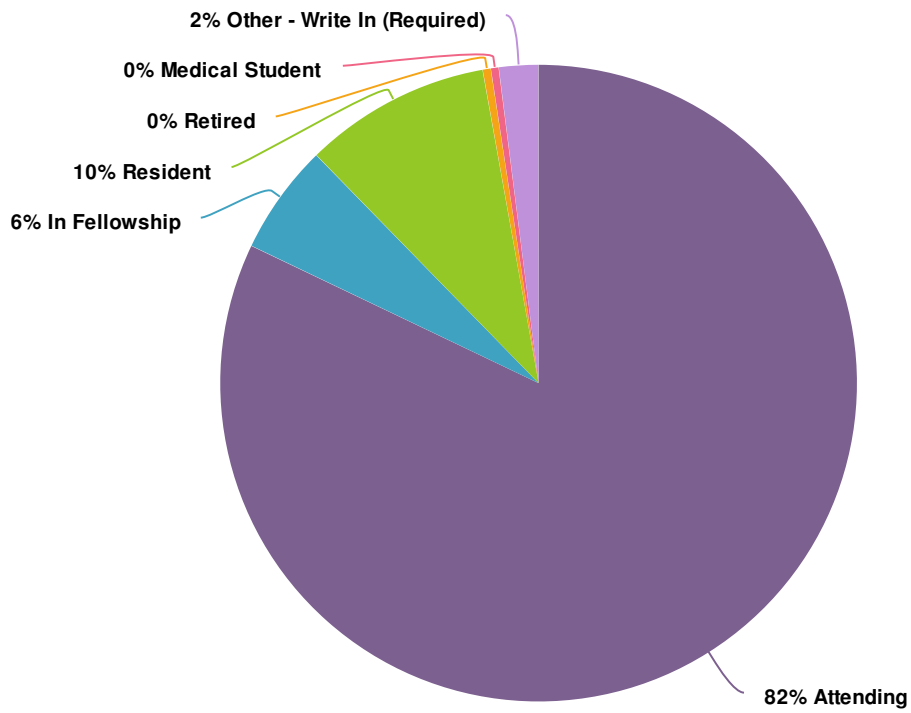

| Value                       | Percent | Responses |
|-----------------------------|---------|-----------|
| Attending                   | 82.1%   | 207       |
| In Fellowship               | 5.6%    | 14        |
| Resident                    | 9.5%    | 24        |
| Retired                     | 0.4%    | 1         |
| Medical Student             | 0.4%    | 1         |
| Other - Write In (Required) | 2.0%    | 5         |

Totals: 252

| <b>Other - Write In (Required)</b> | <b>Count</b> |
|------------------------------------|--------------|
|------------------------------------|--------------|

---

|                                |   |
|--------------------------------|---|
| International medical graduate | 1 |
|--------------------------------|---|

|        |   |
|--------|---|
| Locums | 1 |
|--------|---|

|                             |   |
|-----------------------------|---|
| Private Outpatient Practice | 1 |
|-----------------------------|---|

|                  |   |
|------------------|---|
| Private practice | 1 |
|------------------|---|

|                                      |   |
|--------------------------------------|---|
| free standing rehab medical director | 1 |
|--------------------------------------|---|

---

|        |   |
|--------|---|
| Totals | 5 |
|--------|---|

## 2. Which best describes your current level of education?

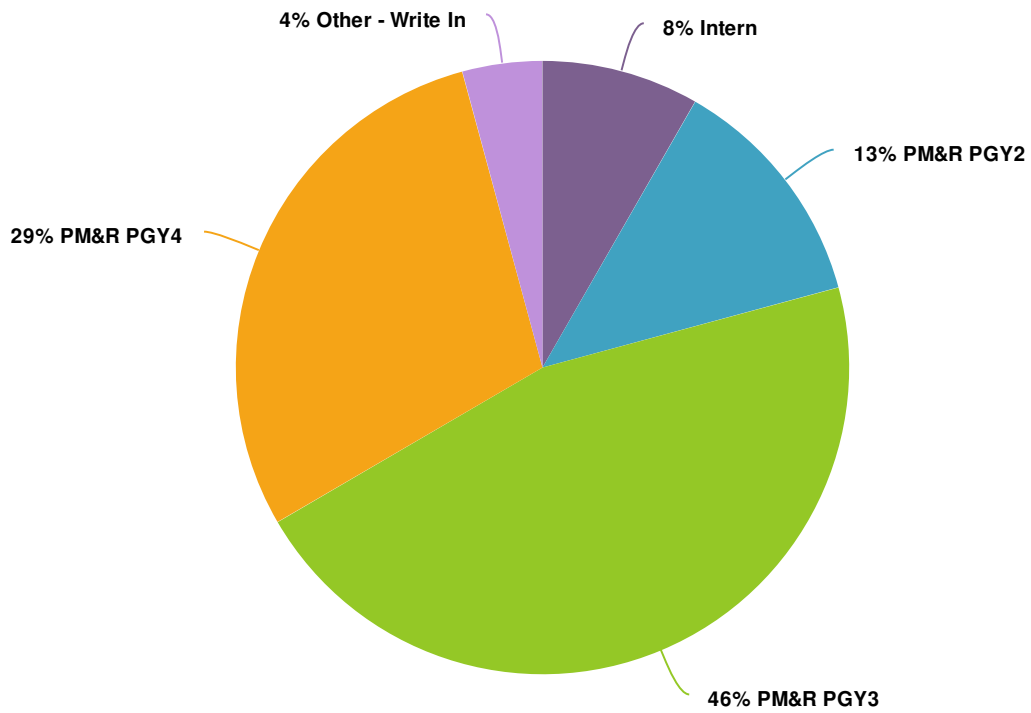

| Value            | Percent | Responses |
|------------------|---------|-----------|
| Intern           | 8.3%    | 2         |
| PM&R PGY2        | 12.5%   | 3         |
| PM&R PGY3        | 45.8%   | 11        |
| PM&R PGY4        | 29.2%   | 7         |
| Other - Write In | 4.2%    | 1         |

Totals: 24

| Other - Write In | Count |
|------------------|-------|
| PMR PGY5         | 1     |
| Totals           | 1     |

### 3. What sub specialty are you pursuing in your fellowship?

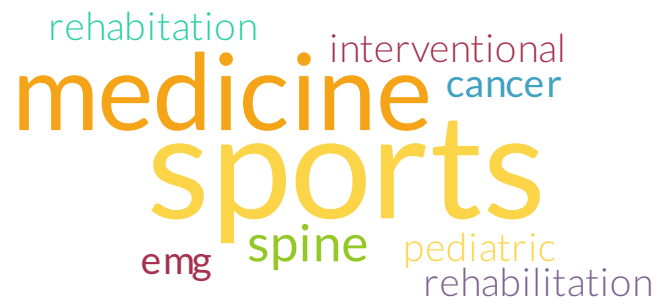

| ResponseID | Response                          |
|------------|-----------------------------------|
| 80         | Spine and sports                  |
| 85         | Sports Medicine                   |
| 87         | sports medicine                   |
| 90         | Sports Medicine                   |
| 118        | Sports                            |
| 161        | Interventional Spine              |
| 169        | Cancer Rehabilitation             |
| 177        | Sports Medicine                   |
| 210        | Pediatric Rehabilitation          |
| 215        | Sports Medicine                   |
| 231        | Pediatric Rehabilitation Medicine |
| 253        | Interventional spine, EMG, sports |
| 255        | Pediatric                         |

#### 4. How many years have you been in practice?

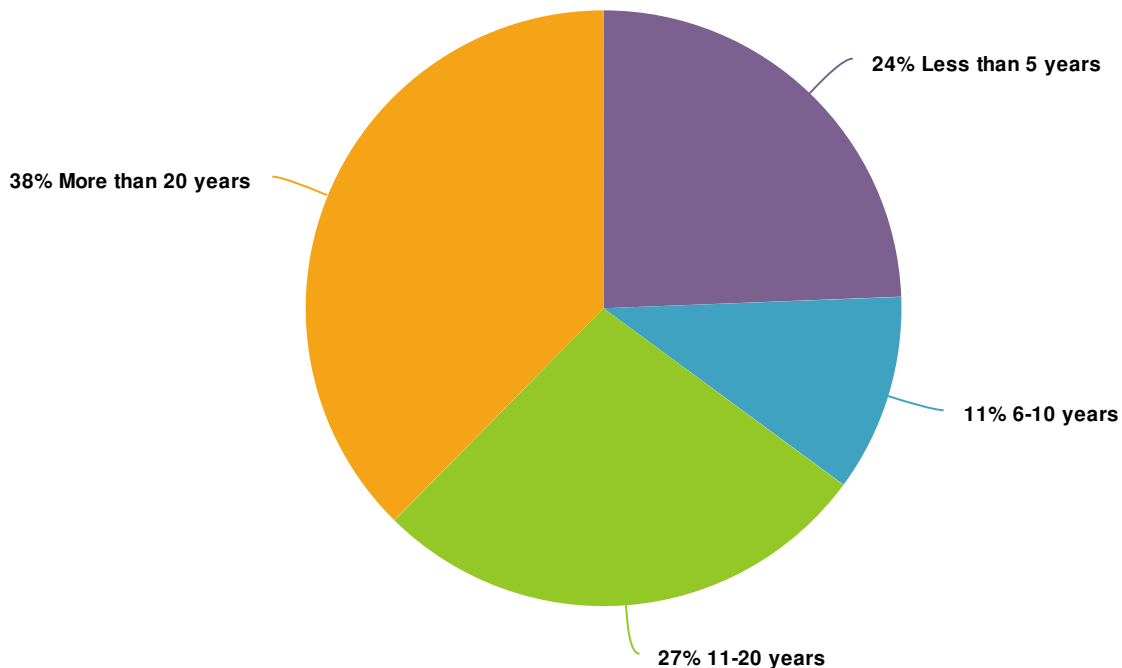

| Value              | Percent | Responses |
|--------------------|---------|-----------|
| Less than 5 years  | 24.4%   | 50        |
| 6-10 years         | 10.7%   | 22        |
| 11-20 years        | 27.3%   | 56        |
| More than 20 years | 37.6%   | 77        |

Totals: 205

| Other - Write In | Count |
|------------------|-------|
| Totals           | 0     |

5. Which of the following best describes the setting in which you spend the majority of your clinical practice?

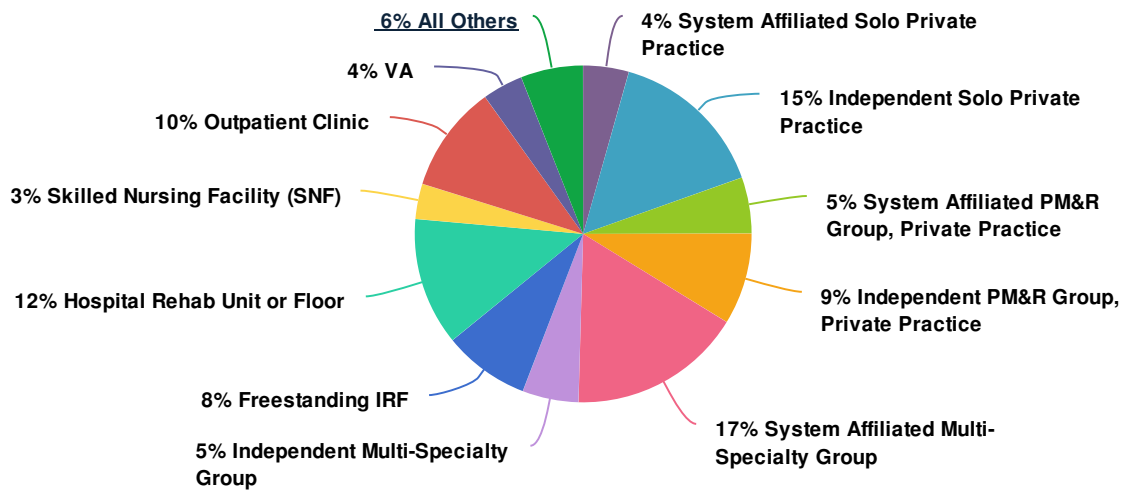

| Value                                          |                                                                                      | Percent | Responses |
|------------------------------------------------|--------------------------------------------------------------------------------------|---------|-----------|
| System Affiliated Solo Private Practice        |    | 4.4%    | 9         |
| Independent Solo Private Practice              |    | 15.2%   | 31        |
| System Affiliated PM&R Group, Private Practice |    | 5.4%    | 11        |
| Independent PM&R Group, Private Practice       |    | 8.8%    | 18        |
| System Affiliated Multi-Specialty Group        |    | 16.7%   | 34        |
| Independent Multi-Specialty Group              |    | 5.4%    | 11        |
| Freestanding IRF                               |    | 8.3%    | 17        |
| Hospital Rehab Unit or Floor                   |    | 12.3%   | 25        |
| Skilled Nursing Facility (SNF)                 |    | 3.4%    | 7         |
| Long-term Acute Care (LTach)                   |    | 1.0%    | 2         |
| Sub-Acute Care Facility                        |    | 1.0%    | 2         |
| Outpatient Clinic                              |  | 10.3%   | 21        |
| Home Health                                    |  | 0.5%    | 1         |
| Non-Clinical                                   |  | 1.0%    | 2         |
| VA                                             |  | 3.9%    | 8         |
| Other - Write In                               |  | 2.5%    | 5         |

Totals: 204



| <b>Other - Write In</b>       | <b>Count</b> |
|-------------------------------|--------------|
| Academic Children's Hospital  | 1            |
| Academic pmr practice and irf | 1            |
| HMO                           | 1            |
| Independent ortho group       | 1            |
| Locum tenens                  | 1            |
| Totals                        | 5            |

6. Which of the following clinical area(s) do you consider to be your primary focus?  
 (select up to 5)

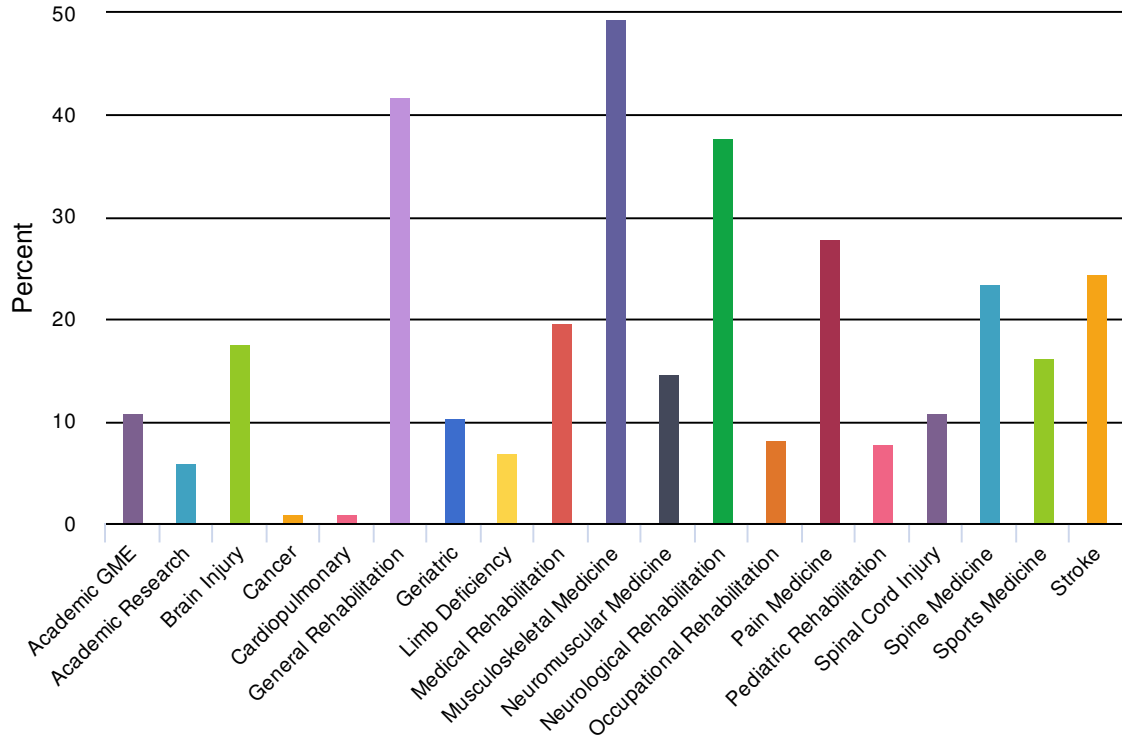

| Value                       |  | Percent | Responses |
|-----------------------------|--|---------|-----------|
| Academic GME                |  | 10.8%   | 22        |
| Academic Research           |  | 5.9%    | 12        |
| Brain Injury                |  | 17.6%   | 36        |
| Cancer                      |  | 1.0%    | 2         |
| Cardiopulmonary             |  | 1.0%    | 2         |
| General Rehabilitation      |  | 41.7%   | 85        |
| Geriatric                   |  | 10.3%   | 21        |
| Limb Deficiency             |  | 6.9%    | 14        |
| Medical Rehabilitation      |  | 19.6%   | 40        |
| Musculoskeletal Medicine    |  | 49.5%   | 101       |
| Neuromuscular Medicine      |  | 14.7%   | 30        |
| Neurological Rehabilitation |  | 37.7%   | 77        |
| Occupational Rehabilitation |  | 8.3%    | 17        |
| Pain Medicine               |  | 27.9%   | 57        |
| Pediatric Rehabilitation    |  | 7.8%    | 16        |
| Spinal Cord Injury          |  | 10.8%   | 22        |
| Spine Medicine              |  | 23.5%   | 48        |
| Sports Medicine             |  | 16.2%   | 33        |
| Stroke                      |  | 24.5%   | 50        |

## 7. What is your primary clinical work?

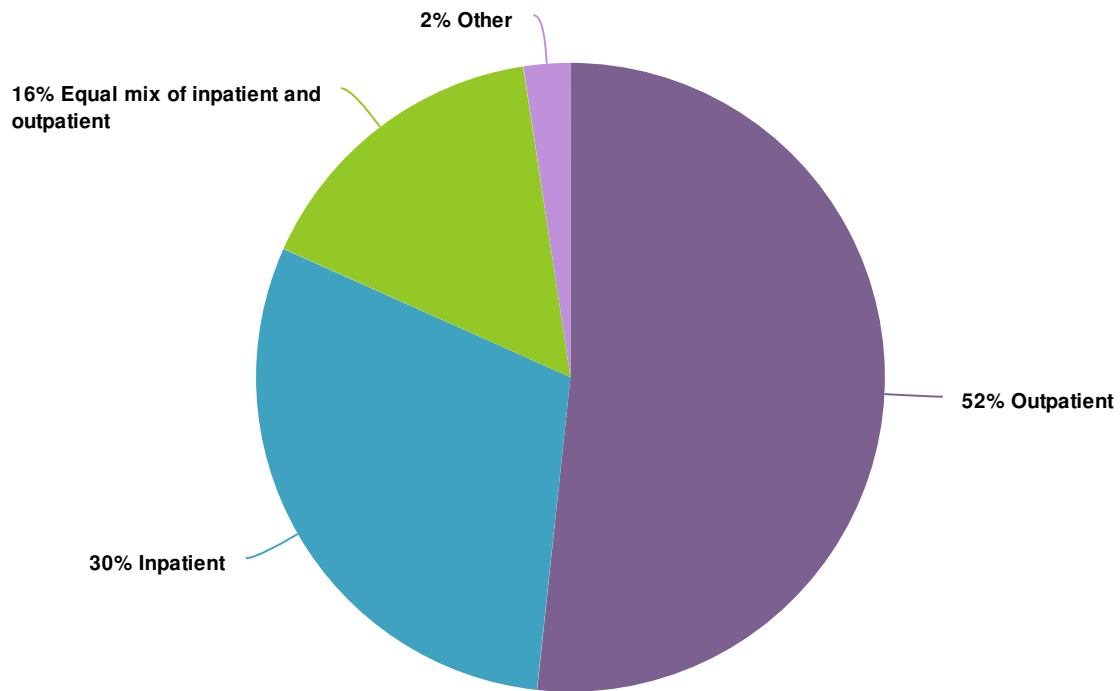

| Value                                 |                                                                                     | Percent | Responses |
|---------------------------------------|-------------------------------------------------------------------------------------|---------|-----------|
| Outpatient                            |  | 51.7%   | 107       |
| Inpatient                             |  | 30.0%   | 62        |
| Equal mix of inpatient and outpatient |  | 15.9%   | 33        |
| Other                                 |  | 2.4%    | 5         |

Totals: 207

## 8. In what region of the United States do you practice?

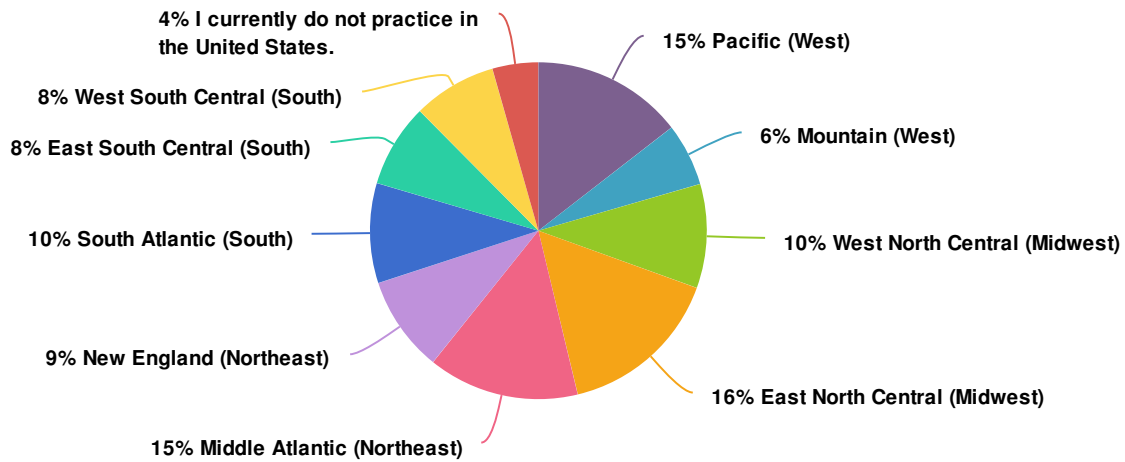

| Value                                             | Percent | Responses |
|---------------------------------------------------|---------|-----------|
| Pacific (West)                                    | 14.5%   | 36        |
| Mountain (West)                                   | 6.0%    | 15        |
| West North Central (Midwest)                      | 10.0%   | 25        |
| East North Central (Midwest)                      | 15.7%   | 39        |
| Middle Atlantic (Northeast)                       | 14.5%   | 36        |
| New England (Northeast)                           | 9.2%    | 23        |
| South Atlantic (South)                            | 9.6%    | 24        |
| East South Central (South)                        | 8.0%    | 20        |
| West South Central (South)                        | 8.0%    | 20        |
| I currently do not practice in the United States. | 4.4%    | 11        |

Totals: 249

## 9. In what state or territory are you currently practicing or training?

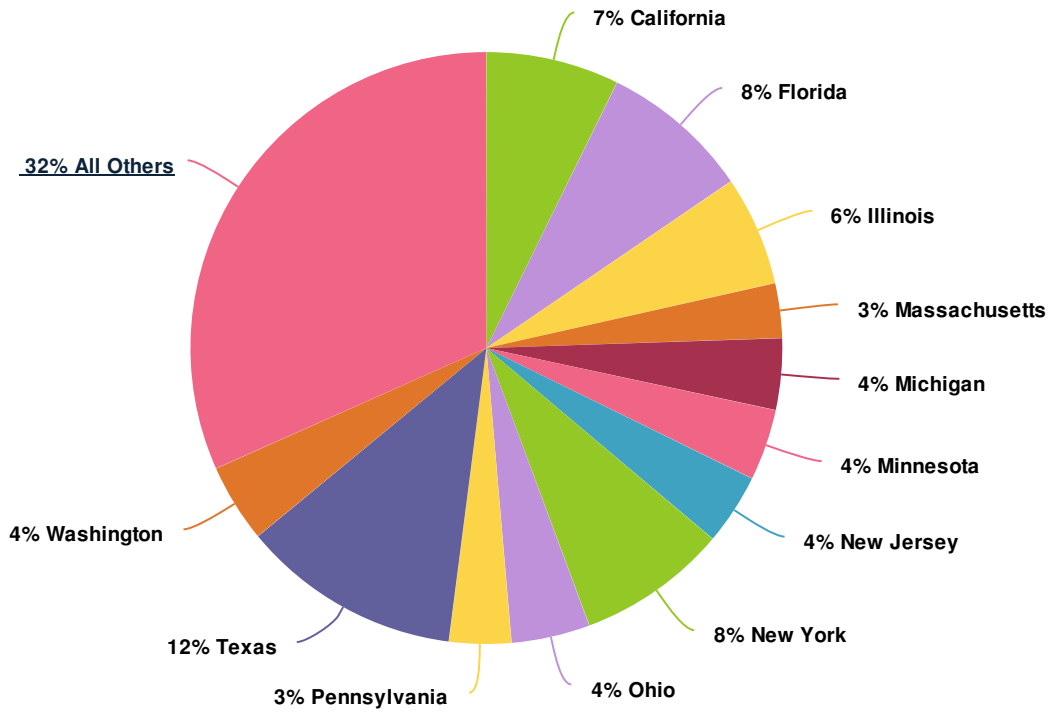

| Value         | Percent | Responses |
|---------------|---------|-----------|
| California    | 7.3%    | 17        |
| Florida       | 8.2%    | 19        |
| Illinois      | 6.0%    | 14        |
| Massachusetts | 3.0%    | 7         |
| Michigan      | 3.9%    | 9         |
| Minnesota     | 3.9%    | 9         |
| New Jersey    | 3.9%    | 9         |
| New York      | 8.2%    | 19        |
| Ohio          | 4.3%    | 10        |
| Pennsylvania  | 3.4%    | 8         |
| Texas         | 12.0%   | 28        |
| Washington    | 4.3%    | 10        |

Totals: 233

| Value          |                                                                                     | Percent | Responses |
|----------------|-------------------------------------------------------------------------------------|---------|-----------|
| Alabama        |    | 0.4%    | 1         |
| Arizona        |    | 1.7%    | 4         |
| Arkansas       |    | 0.9%    | 2         |
| Colorado       |    | 2.6%    | 6         |
| Connecticut    |    | 2.6%    | 6         |
| Georgia        |    | 0.4%    | 1         |
| Hawaii         |    | 0.9%    | 2         |
| Indiana        |    | 1.3%    | 3         |
| Iowa           |    | 1.7%    | 4         |
| Kansas         |    | 0.9%    | 2         |
| Maryland       |    | 1.3%    | 3         |
| Missouri       |  | 1.7%    | 4         |
| Montana        |  | 0.4%    | 1         |
| Nebraska       |  | 1.3%    | 3         |
| Nevada         |  | 1.3%    | 3         |
| New Hampshire  |  | 0.4%    | 1         |
| New Mexico     |  | 0.4%    | 1         |
| North Carolina |  | 2.1%    | 5         |
| Oklahoma       |  | 0.4%    | 1         |
| Puerto Rico    |  | 0.9%    | 2         |
| Rhode Island   |  | 0.4%    | 1         |
| South Carolina |  | 0.4%    | 1         |

Totals: 233

| Value            |                                                                                   | Percent | Responses |
|------------------|-----------------------------------------------------------------------------------|---------|-----------|
| Tennessee        |  | 0.9%    | 2         |
| Utah             |  | 1.3%    | 3         |
| Virginia         |  | 0.9%    | 2         |
| Washington, D.C. |  | 1.7%    | 4         |
| West Virginia    |  | 0.4%    | 1         |
| Wisconsin        |  | 2.1%    | 5         |

**Totals: 233**



### 10. What is your gender identity?

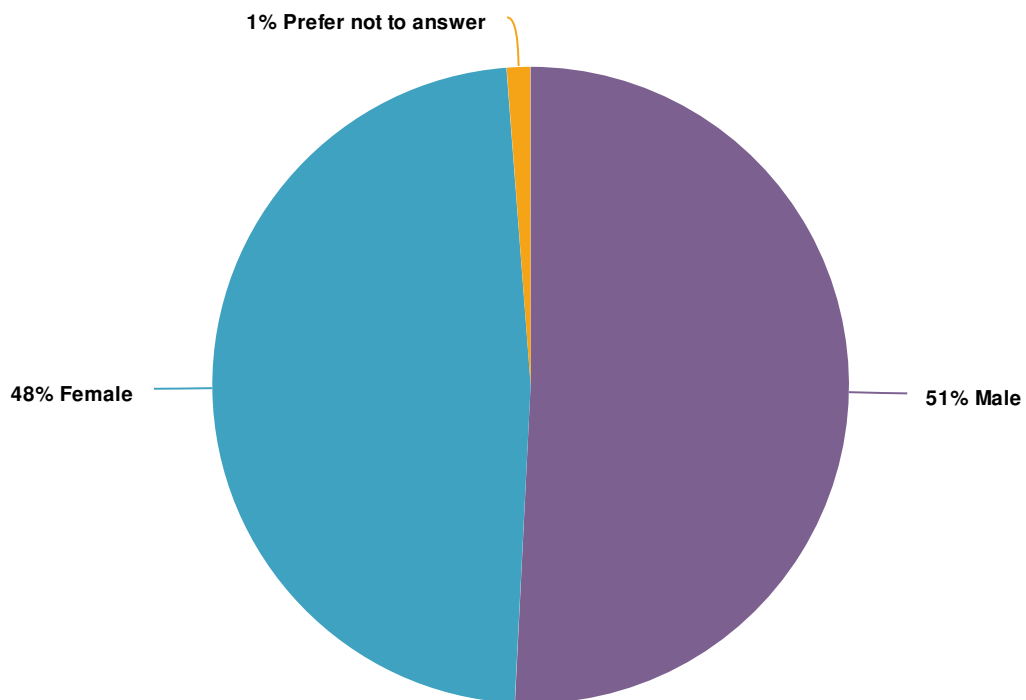

| Value                | Percent | Responses          |
|----------------------|---------|--------------------|
| Male                 | 50.8%   | 126                |
| Female               | 48.0%   | 119                |
| Prefer not to answer | 1.2%    | 3                  |
|                      |         | <b>Totals: 248</b> |

## 11. With which race/ethnicity do you identify yourself?

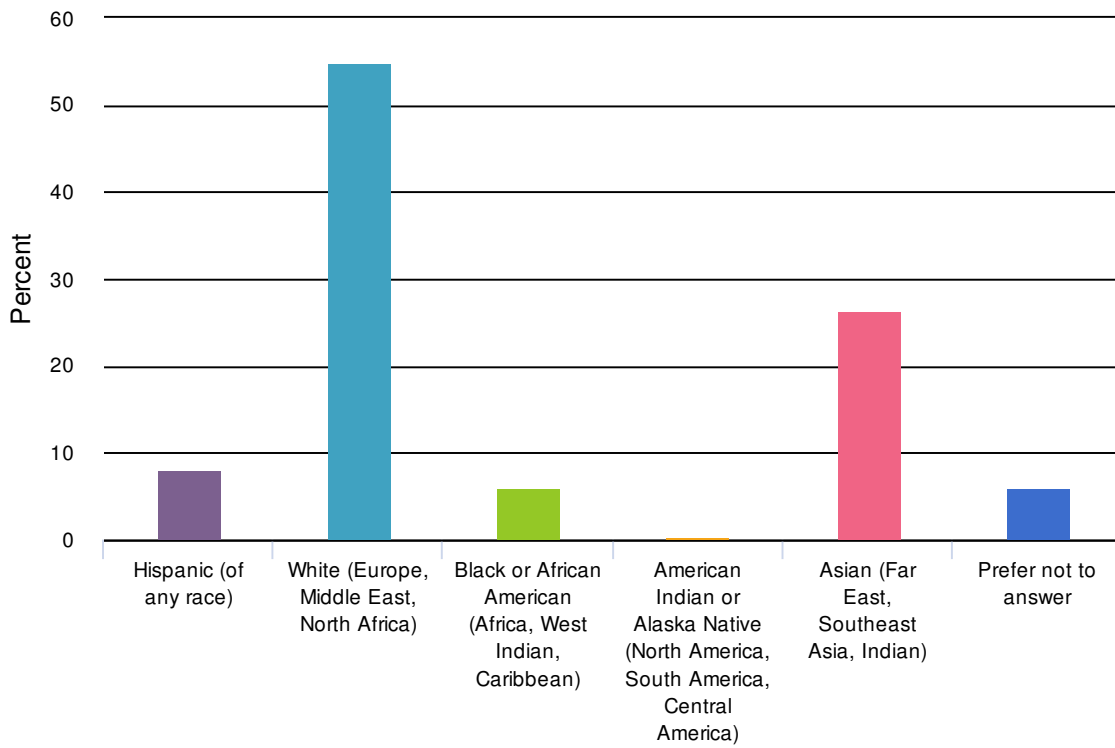

| Value                                                                            | Percent | Responses |
|----------------------------------------------------------------------------------|---------|-----------|
| Hispanic (of any race)                                                           | 8.1%    | 20        |
| White (Europe, Middle East, North Africa)                                        | 54.9%   | 135       |
| Black or African American (Africa, West Indian, Caribbean)                       | 6.1%    | 15        |
| American Indian or Alaska Native (North America, South America, Central America) | 0.4%    | 1         |
| Asian (Far East, Southeast Asia, Indian)                                         | 26.4%   | 65        |
| Prefer not to answer                                                             | 6.1%    | 15        |

12. Do you consider yourself to have a disability as defined by the Americans with Disabilities Act? The ADA defines an individual with a disability as a person who: Has a physical or mental impairment that substantially limits one or more major life activities; Has a record of such an impairment; or Is regarded as having such an impairment.

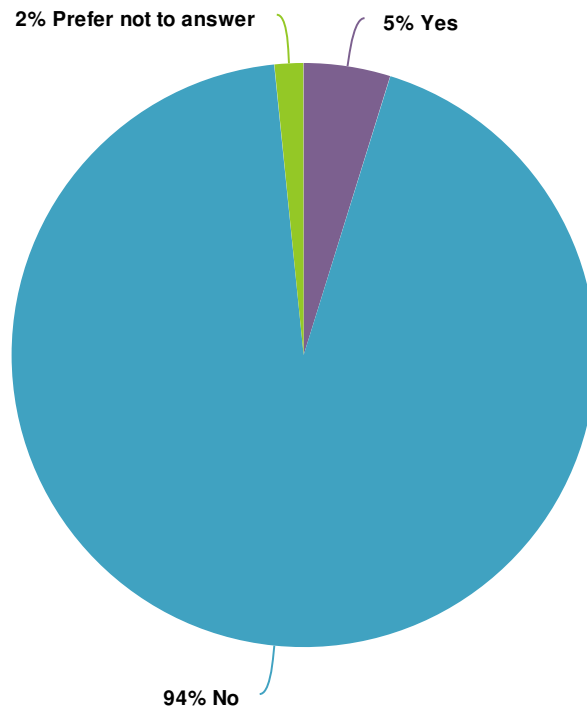

| Value                | Percent | Responses |
|----------------------|---------|-----------|
| Yes                  | 4.8%    | 12        |
| No                   | 93.6%   | 233       |
| Prefer not to answer | 1.6%    | 4         |

Totals: 249

### 13. Do you consider yourself to be a gender or sexual minority?

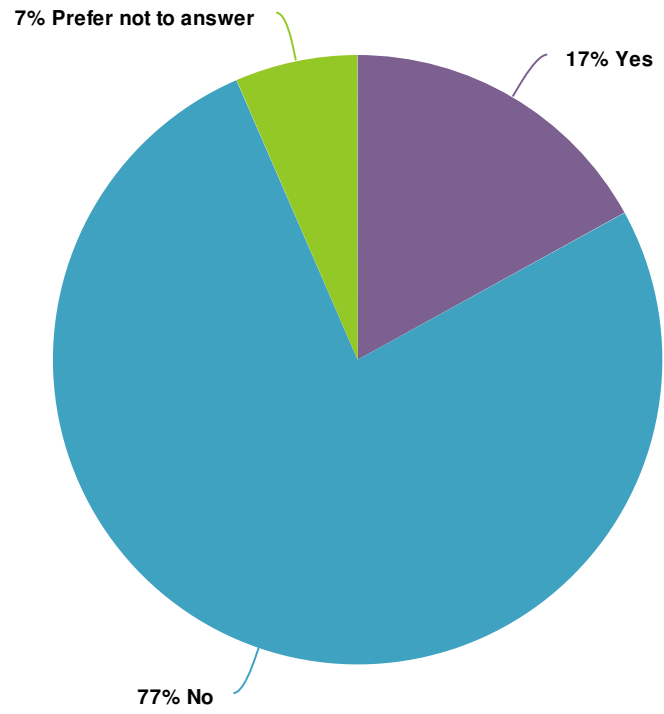

| Value                | Percent | Responses |
|----------------------|---------|-----------|
| Yes                  | 17.0%   | 42        |
| No                   | 76.5%   | 189       |
| Prefer not to answer | 6.5%    | 16        |

Totals: 247

14. What is your familiarity with concepts of:

|                   | Not at all familiar | Slightly familiar | Somewhat familiar | Moderately familiar | Extremely familiar | Responses |
|-------------------|---------------------|-------------------|-------------------|---------------------|--------------------|-----------|
| Disability Rights |                     |                   |                   |                     |                    |           |
| Count             | 5                   | 20                | 70                | 106                 | 47                 | 248       |
| Row %             | 2.0%                | 8.1%              | 28.2%             | 42.7%               | 19.0%              |           |
| Health Equity     |                     |                   |                   |                     |                    |           |
| Count             | 13                  | 20                | 68                | 100                 | 46                 | 247       |
| Row %             | 5.3%                | 8.1%              | 27.5%             | 40.5%               | 18.6%              |           |
| Intersectionality |                     |                   |                   |                     |                    |           |
| Count             | 112                 | 33                | 63                | 33                  | 7                  | 248       |
| Row %             | 45.2%               | 13.3%             | 25.4%             | 13.3%               | 2.8%               |           |
| Totals            |                     |                   |                   |                     |                    |           |
| Total Responses   |                     |                   |                   |                     |                    | 248       |

15. Using your own definition of “burnout,” please answer one of the following:

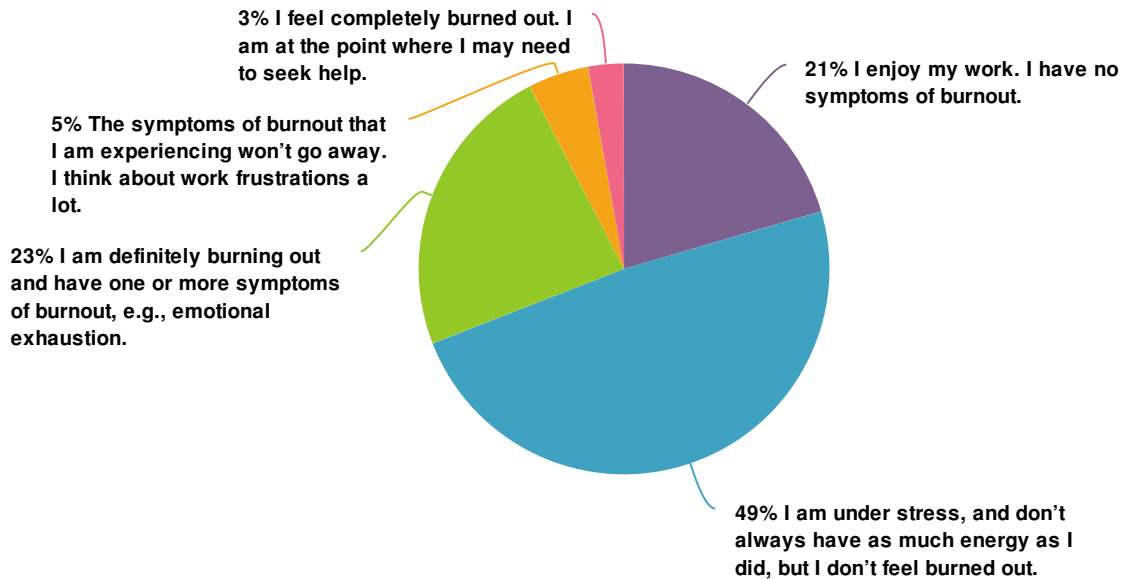

| Value                                                                                                | Percent | Responses |
|------------------------------------------------------------------------------------------------------|---------|-----------|
| I enjoy my work. I have no symptoms of burnout.                                                      | 20.5%   | 51        |
| I am under stress, and don't always have as much energy as I did, but I don't feel burned out.       | 48.6%   | 121       |
| I am definitely burning out and have one or more symptoms of burnout, e.g., emotional exhaustion.    | 23.3%   | 58        |
| The symptoms of burnout that I am experiencing won't go away. I think about work frustrations a lot. | 4.8%    | 12        |
| I feel completely burned out. I am at the point where I may need to seek help.                       | 2.8%    | 7         |

Totals: 249

16. What happened to your IRF during COVID-19 pandemic? Select all that apply.

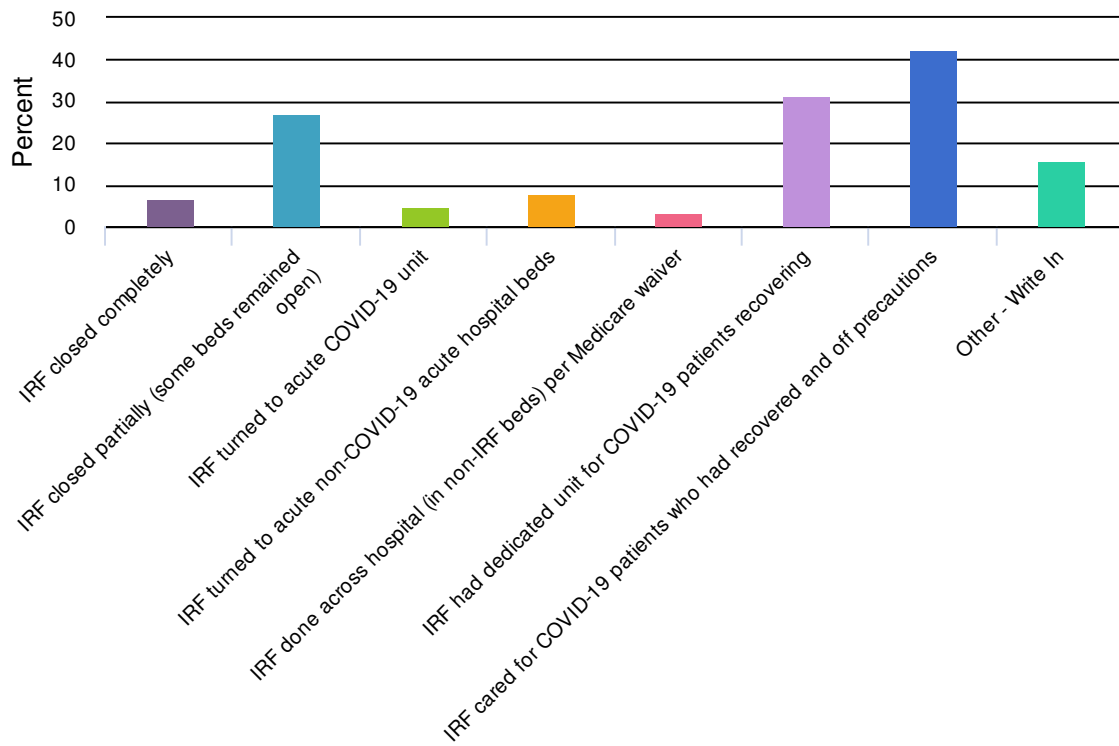

| Value                                                                 | Percent | Responses |
|-----------------------------------------------------------------------|---------|-----------|
| IRF closed completely                                                 | 6.7%    | 6         |
| IRF closed partially (some beds remained open)                        | 27.0%   | 24        |
| IRF turned to acute COVID-19 unit                                     | 4.5%    | 4         |
| IRF turned to acute non-COVID-19 acute hospital beds                  | 7.9%    | 7         |
| IRF done across hospital (in non-IRF beds) per Medicare waiver        | 3.4%    | 3         |
| IRF had dedicated unit for COVID-19 patients recovering               | 31.5%   | 28        |
| IRF cared for COVID-19 patients who had recovered and off precautions | 42.7%   | 38        |
| Other - Write In                                                      | 15.7%   | 14        |

| Other - Write In                                                                                                       | Count |
|------------------------------------------------------------------------------------------------------------------------|-------|
| No change                                                                                                              | 2     |
| IRF continued functioning as before, just implementing precautions for COVID-19 patients that were admitted to the IRF | 1     |
| No changr                                                                                                              | 1     |
| None of the above                                                                                                      | 1     |
| Not affiliated with an IRF                                                                                             | 1     |
| Nothing changed                                                                                                        | 1     |
| Partially reduced in size and now back to full capacity                                                                | 1     |
| Remained open but reduced census and available community psychiatrists reduced the need for locum tenems providers     | 1     |
| Telemedicine visits for the doctors                                                                                    | 1     |
| n/a                                                                                                                    | 1     |
| post acute rehab inpatients remained unchanged                                                                         | 1     |
| stayed open                                                                                                            | 1     |
| Totals                                                                                                                 | 13    |



17. What happened to your work during COVID-19 pandemic in the inpatient setting? Select all that apply.

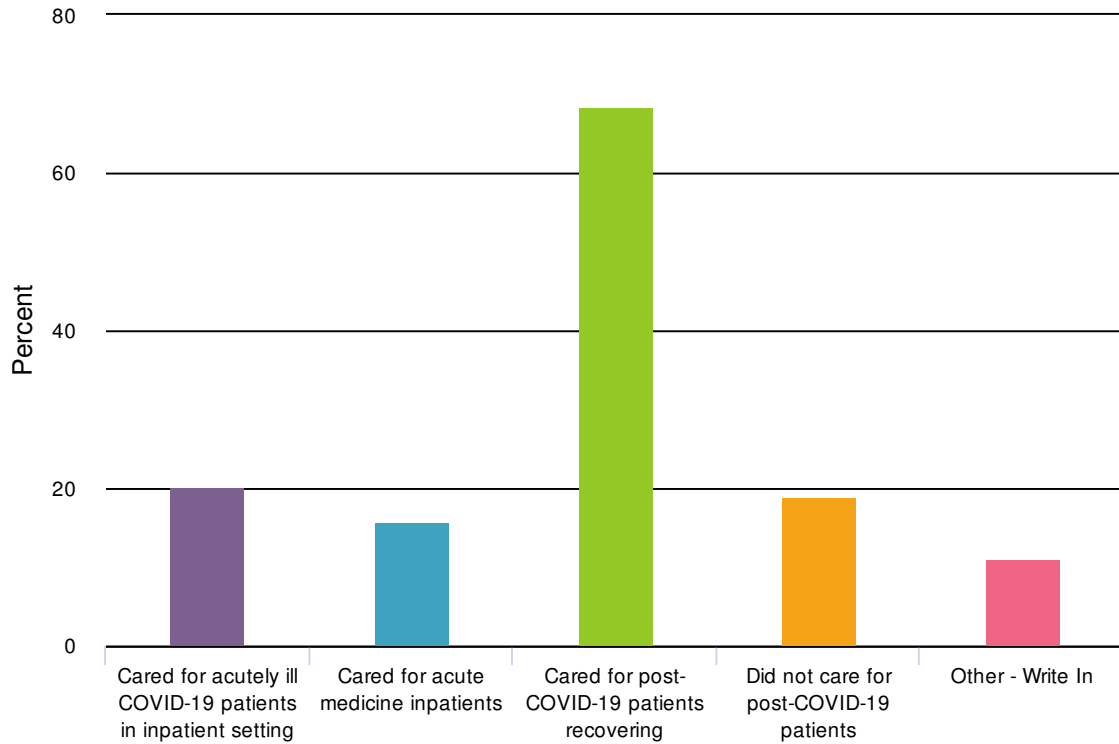

| Value                                                        | Percent | Responses |
|--------------------------------------------------------------|---------|-----------|
| Cared for acutely ill COVID-19 patients in inpatient setting | 20.2%   | 18        |
| Cared for acute medicine inpatients                          | 15.7%   | 14        |
| Cared for post-COVID-19 patients recovering                  | 68.5%   | 61        |
| Did not care for post-COVID-19 patients                      | 19.1%   | 17        |
| Other - Write In                                             | 11.2%   | 10        |

| Other - Write In                                                                                                             | Count |
|------------------------------------------------------------------------------------------------------------------------------|-------|
| Cared for acutely covid patients in SNF                                                                                      | 1     |
| Cared for typical IRF patients                                                                                               | 1     |
| Consults in acute care hospital                                                                                              | 1     |
| I would have cared for them but there were only a couple of kids with respiratory COVID and no neurologic COVID found so far | 1     |
| Inpatient PM&R consults of covid and non-covid patients                                                                      | 1     |
| No changes                                                                                                                   | 1     |
| Welcomed post-covid patients but need was minimal                                                                            | 1     |
| Work ceased to exist                                                                                                         | 1     |
| as well as ongoing care of other inpatient rehab patients; outpatient limited primarily to telehealth                        | 1     |
| rehab medicine consults in acute care hospital on COVID patients                                                             | 1     |
| Totals                                                                                                                       | 10    |

18. What measures did your department place to keep you healthy/safe while working inpatient? Select all that apply.

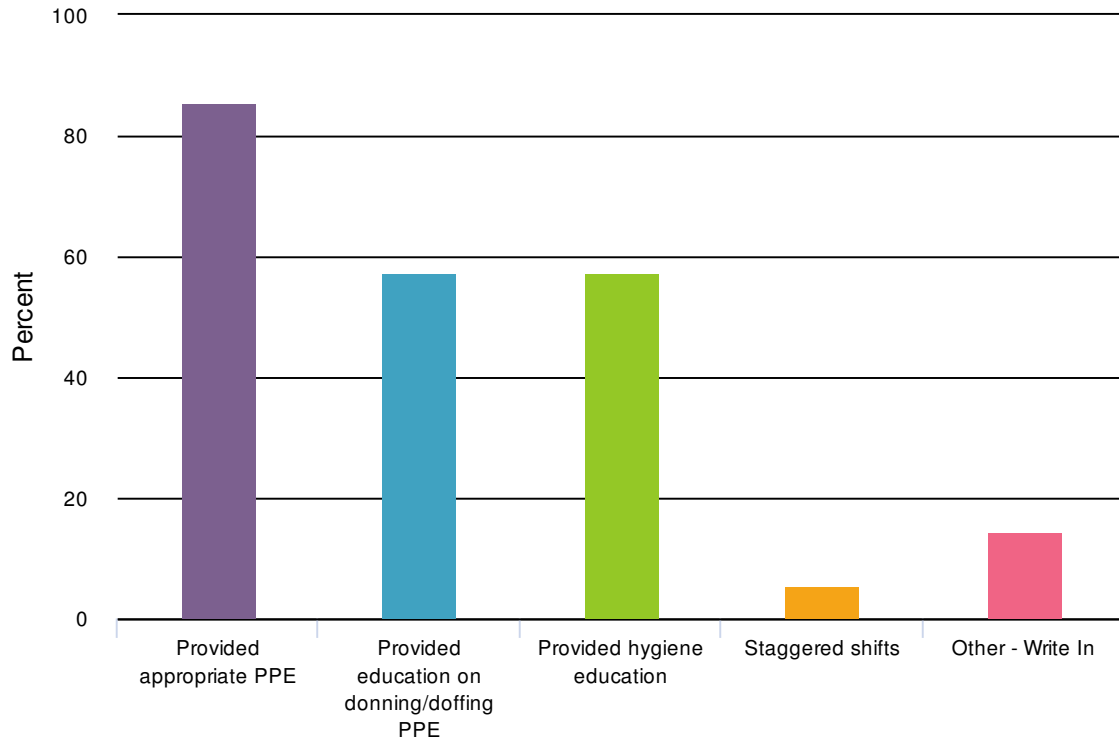

| Value                                     |                                                                                     | Percent | Responses |
|-------------------------------------------|-------------------------------------------------------------------------------------|---------|-----------|
| Provided appropriate PPE                  |  | 85.4%   | 76        |
| Provided education on donning/doffing PPE |  | 57.3%   | 51        |
| Provided hygiene education                |  | 57.3%   | 51        |
| Staggered shifts                          |  | 5.6%    | 5         |
| Other - Write In                          |  | 14.6%   | 13        |

| Other - Write In                                                                                | Count |
|-------------------------------------------------------------------------------------------------|-------|
| Did televisits in one facility. The other facilities did not allow providers into the building. | 1     |
| Eventually given appropriate PPE but still had to reuse                                         | 1     |
| Had PPE shortages                                                                               | 1     |
| Limited physicians working to 3-4. Others went home                                             | 1     |
| N/A                                                                                             | 1     |
| No irc                                                                                          | 1     |
| Provided robust access for testing                                                              | 1     |
| Temperature checks                                                                              | 1     |
| limited buildings tto which I go to see residents                                               | 1     |
| not admitting covid positive patients, standard well patient precautions were taken             | 1     |
| spaced out work places and made team meetings via conference phones                             | 1     |
| telehealth for all post acute rehab inpatients                                                  | 1     |
| telework                                                                                        | 1     |
| Totals                                                                                          | 13    |

19. What measures did your department take to educate you on treating patients with COVID-19? Select all that apply.

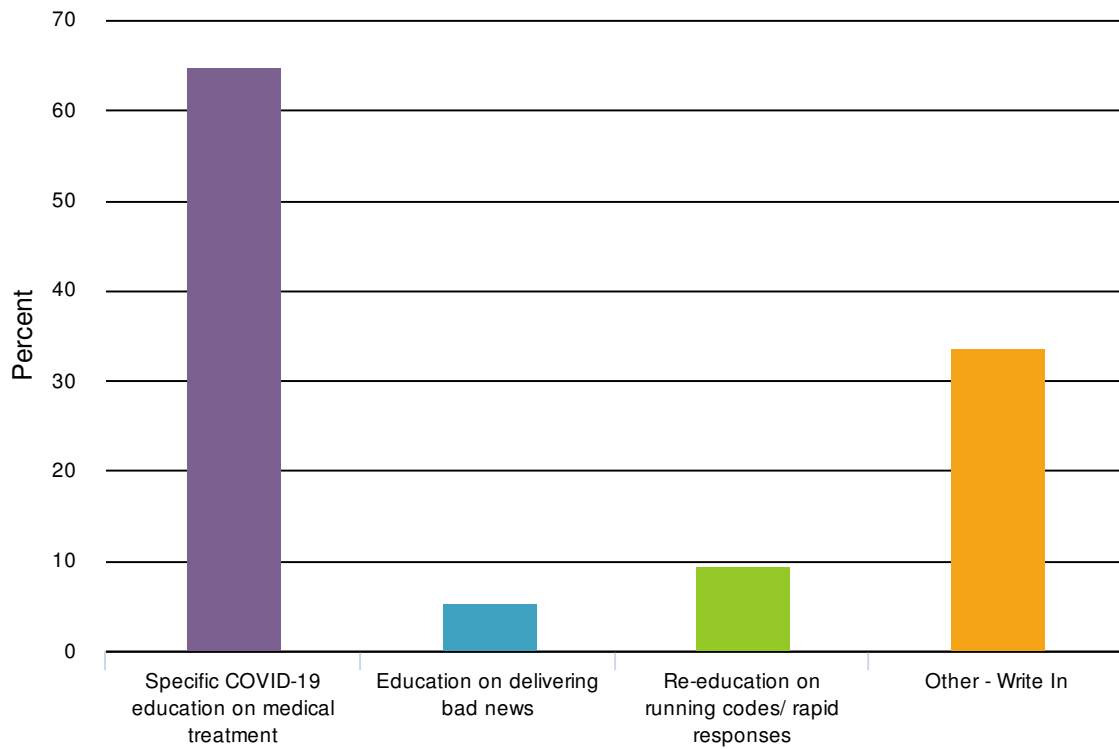

| Value                                            |                                                                                      | Percent | Responses |
|--------------------------------------------------|--------------------------------------------------------------------------------------|---------|-----------|
| Specific COVID-19 education on medical treatment |  | 64.9%   | 48        |
| Education on delivering bad news                 |  | 5.4%    | 4         |
| Re-education on running codes/ rapid responses   |  | 9.5%    | 7         |
| Other - Write In                                 |  | 33.8%   | 25        |

| Other - Write In                                                                                                                                                          | Count |
|---------------------------------------------------------------------------------------------------------------------------------------------------------------------------|-------|
| none                                                                                                                                                                      | 6     |
| None                                                                                                                                                                      | 4     |
| I am the only physician in my department. I took it upon myself to review critical care medicine with an online course provided by the Society of Critical Care Medicine. | 1     |
| N/A                                                                                                                                                                       | 1     |
| NA                                                                                                                                                                        | 1     |
| No education provided                                                                                                                                                     | 1     |
| No irf                                                                                                                                                                    | 1     |
| None of the above                                                                                                                                                         | 1     |
| None of the above, IRF completely over looked by hospital admin                                                                                                           | 1     |
| None provided                                                                                                                                                             | 1     |
| None specific                                                                                                                                                             | 1     |
| None was required                                                                                                                                                         | 1     |
| having nurse dedicated to ensure proper donning/doffing PPE                                                                                                               | 1     |
| i did not care for active COVID patients                                                                                                                                  | 1     |
| n/a                                                                                                                                                                       | 1     |
| none, did not care for these pts                                                                                                                                          | 1     |
| self taught                                                                                                                                                               | 1     |
| Totals                                                                                                                                                                    | 25    |

20. In addition to any IRF responsibilities did you have any of the following: Select all that apply.

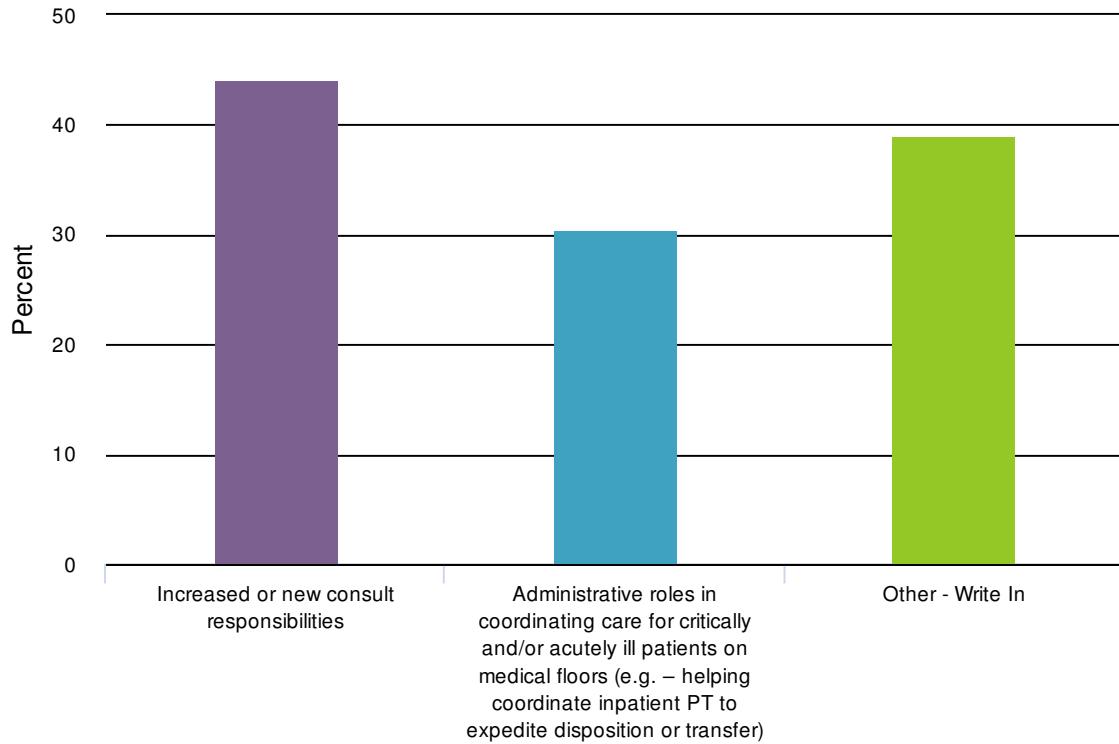

| Value                                                                                                                                                                               | Percent | Responses |
|-------------------------------------------------------------------------------------------------------------------------------------------------------------------------------------|---------|-----------|
| Increased or new consult responsibilities                                                                                                                                           | 44.1%   | 26        |
| Administrative roles in coordinating care for critically and/or acutely ill patients on medical floors (e.g. – helping coordinate inpatient PT to expedite disposition or transfer) | 30.5%   | 18        |
| Other - Write In                                                                                                                                                                    | 39.0%   | 23        |

| Other - Write In                                                                                                                                                                                                                            | Count |
|---------------------------------------------------------------------------------------------------------------------------------------------------------------------------------------------------------------------------------------------|-------|
| None                                                                                                                                                                                                                                        | 5     |
| n/a                                                                                                                                                                                                                                         | 2     |
| none                                                                                                                                                                                                                                        | 2     |
| EMG Practice                                                                                                                                                                                                                                | 1     |
| I am doing Locum work and because of my age, there were restrictions applied on getting jobs. Did an 8 week pilot project doing inpatient Telehealth.                                                                                       | 1     |
| No irf                                                                                                                                                                                                                                      | 1     |
| None of the above                                                                                                                                                                                                                           | 1     |
| None....financial disaster                                                                                                                                                                                                                  | 1     |
| administrative office duties (e.g. answering/sending faxes, answering phone calls, paperwork), covering resident duties (insufficient residents scheduled on inpatient rotations, reason unclear but no coverage for acute care took place) | 1     |
| ethics team working on allocation of resources                                                                                                                                                                                              | 1     |
| informatics support for COVID 19                                                                                                                                                                                                            | 1     |
| lots and lots more meetings relating to COVID-19                                                                                                                                                                                            | 1     |
| no                                                                                                                                                                                                                                          | 1     |
| none needed, volumes did not require                                                                                                                                                                                                        | 1     |
| not any different                                                                                                                                                                                                                           | 1     |
| not applicable                                                                                                                                                                                                                              | 1     |
| Totals                                                                                                                                                                                                                                      | 22    |



21. Has your department been involved in planning for response/care of post-COVID-19 patients?

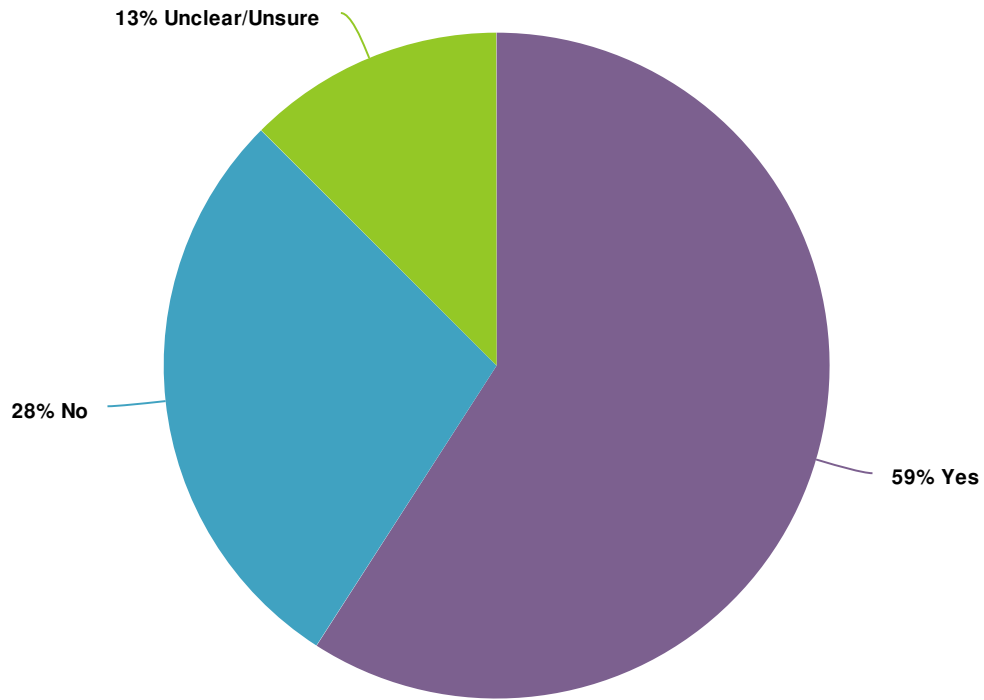

| Value          | Percent | Responses |
|----------------|---------|-----------|
| Yes            | 59.1%   | 52        |
| No             | 28.4%   | 25        |
| Unclear/Unsure | 12.5%   | 11        |

Totals: 88

22. In what way? Select all that apply.

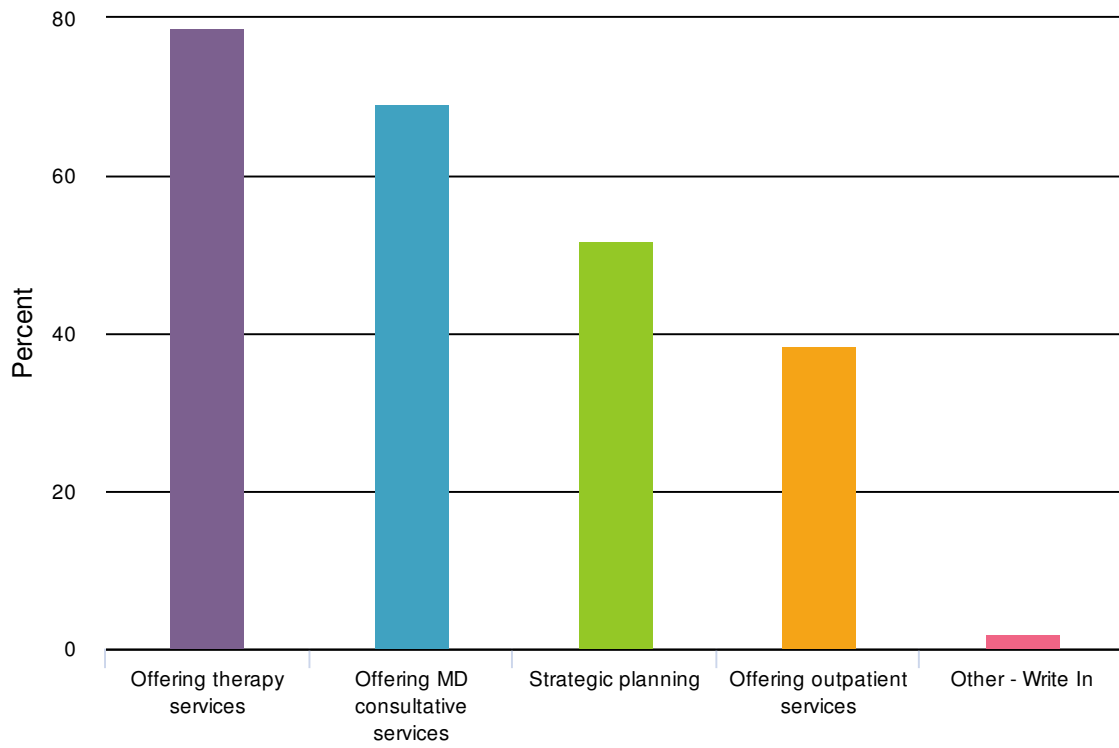

| Value                             |                                                                                     | Percent | Responses |
|-----------------------------------|-------------------------------------------------------------------------------------|---------|-----------|
| Offering therapy services         |  | 78.8%   | 41        |
| Offering MD consultative services |  | 69.2%   | 36        |
| Strategic planning                |  | 51.9%   | 27        |
| Offering outpatient services      |  | 38.5%   | 20        |
| Other - Write In                  |  | 1.9%    | 1         |

23. What other services is your department working with to achieve this? Select all that apply.

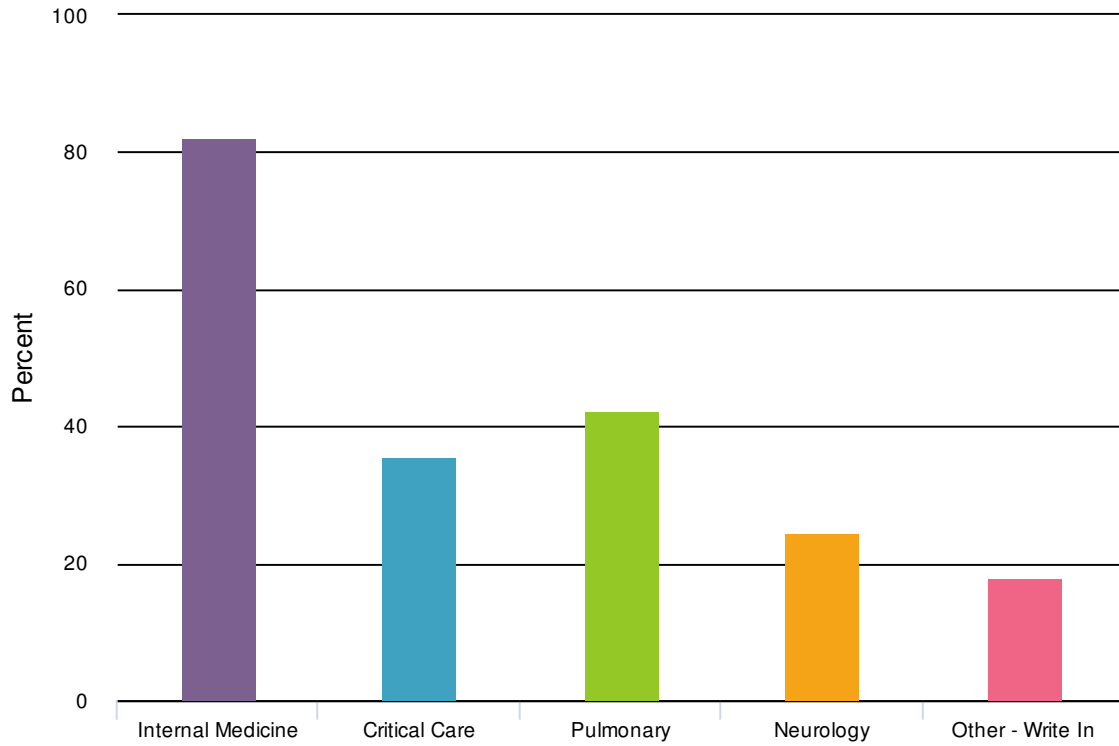

| Value             |                                                                                     | Percent | Responses |
|-------------------|-------------------------------------------------------------------------------------|---------|-----------|
| Internal Medicine |  | 82.2%   | 37        |
| Critical Care     |  | 35.6%   | 16        |
| Pulmonary         |  | 42.2%   | 19        |
| Neurology         |  | 24.4%   | 11        |
| Other - Write In  |  | 17.8%   | 8         |

| Other - Write In                                                                    | Count |
|-------------------------------------------------------------------------------------|-------|
| ID                                                                                  | 2     |
| Hospital Administration                                                             | 1     |
| Infectious disease                                                                  | 1     |
| Shifting care from acute hospital to IRF earlier to free up acutely beds            | 1     |
| Therapy                                                                             | 1     |
| increasing nursing/therapy staffing                                                 | 1     |
| none. The hospital just offloaded all the ill patients and we had to carry the load | 1     |
| Totals                                                                              | 8     |

24. Did you feel prepared to deal with pandemic surge?

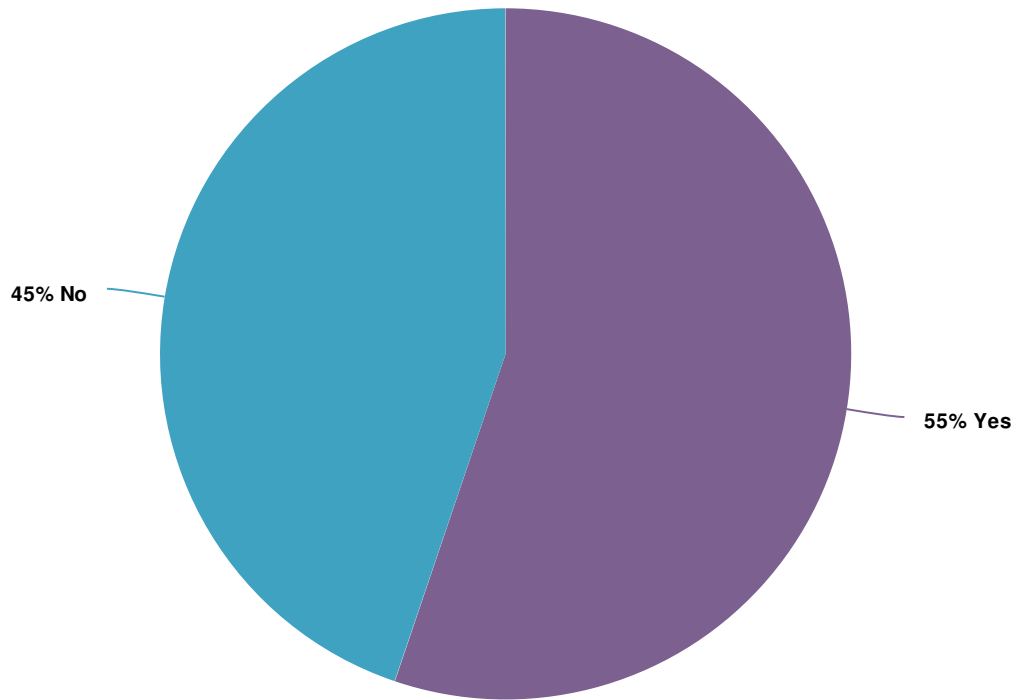

| Value | Percent | Responses |
|-------|---------|-----------|
| Yes   | 55.2%   | 48        |
| No    | 44.8%   | 39        |

Totals: 87

## 25. What would have helped you feel more prepared?

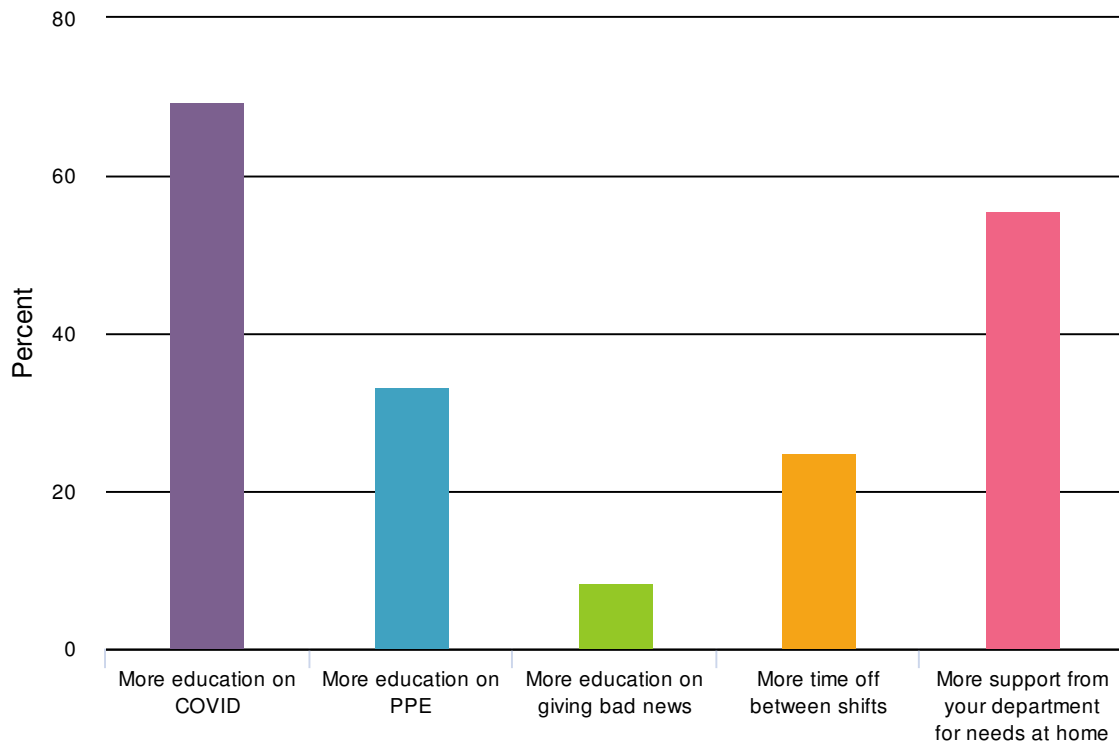

| Value                                               |                                                                                      | Percent | Responses |
|-----------------------------------------------------|--------------------------------------------------------------------------------------|---------|-----------|
| More education on COVID                             |  | 69.4%   | 25        |
| More education on PPE                               |  | 33.3%   | 12        |
| More education on giving bad news                   |  | 8.3%    | 3         |
| More time off between shifts                        |  | 25.0%   | 9         |
| More support from your department for needs at home |  | 55.6%   | 20        |

26. Where do you get your referrals? Select all that apply.

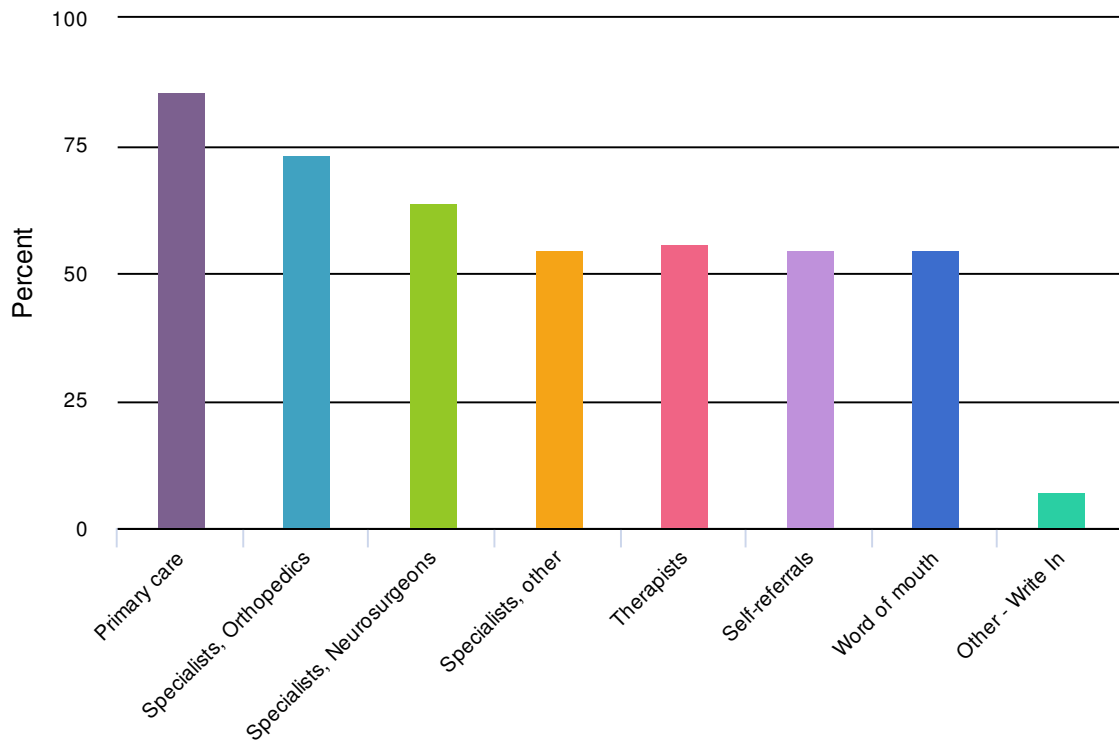

| Value                      | Percent | Responses |
|----------------------------|---------|-----------|
| Primary care               | 85.6%   | 83        |
| Specialists, Orthopedics   | 73.2%   | 71        |
| Specialists, Neurosurgeons | 63.9%   | 62        |
| Specialists, other         | 54.6%   | 53        |
| Therapists                 | 55.7%   | 54        |
| Self-referrals             | 54.6%   | 53        |
| Word of mouth              | 54.6%   | 53        |
| Other - Write In           | 7.2%    | 7         |

| <b>Other - Write In</b> | <b>Count</b> |
|-------------------------|--------------|
|-------------------------|--------------|

---

|                                             |   |
|---------------------------------------------|---|
| Chiropractors , Occupational Health Clinics | 1 |
|---------------------------------------------|---|

|           |   |
|-----------|---|
| Employers | 1 |
|-----------|---|

|                 |   |
|-----------------|---|
| Rheumatologists | 1 |
|-----------------|---|

|                              |   |
|------------------------------|---|
| Work Comp insurers/employers | 1 |
|------------------------------|---|

|           |   |
|-----------|---|
| Work comp | 1 |
|-----------|---|

|               |   |
|---------------|---|
| case managers | 1 |
|---------------|---|

|                          |   |
|--------------------------|---|
| inpatient SCI colleagues | 1 |
|--------------------------|---|

---

|        |   |
|--------|---|
| Totals | 7 |
|--------|---|



27. Rank the Following Impacts of COVID-19 on Your Practice (1 being the greatest challenge, 2 second greatest, etc.)

| Item                                                    | Overall Rank | Rank Distribution                                                                  | Score | No. of Rankings |
|---------------------------------------------------------|--------------|------------------------------------------------------------------------------------|-------|-----------------|
| Restriction/inability to perform procedures             | 1            |  | 470   | 88              |
| Telemedicine                                            | 2            |  | 454   | 88              |
| Restriction to getting physical therapy                 | 3            |  | 427   | 82              |
| Limited interdisciplinary care with surgeons and others | 4            |  | 306   | 78              |
| Increased demand/need for medications as a substitute   | 5            |  | 288   | 78              |
| Illness in the office                                   | 6            |  | 263   | 79              |
| Medication monitoring                                   | 7            |  | 223   | 76              |



28. Approximately what percentage of your practice was telemedicine prior to the COVID-19 pandemic?

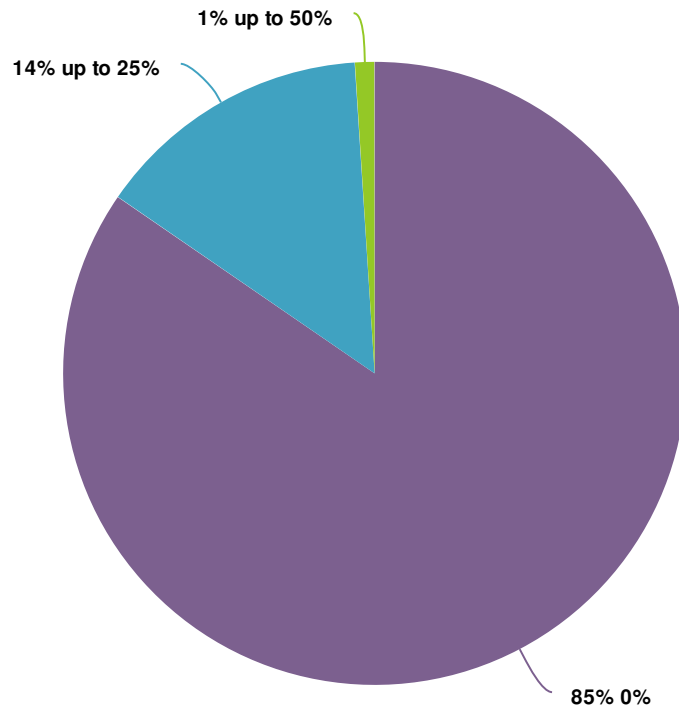

| Value     | Percent | Responses |
|-----------|---------|-----------|
| 0%        | 84.5%   | 82        |
| up to 25% | 14.4%   | 14        |
| up to 50% | 1.0%    | 1         |

Totals: 97

29. During the COVID-19 pandemic, approximately what percentage of your new visits are telemedicine?

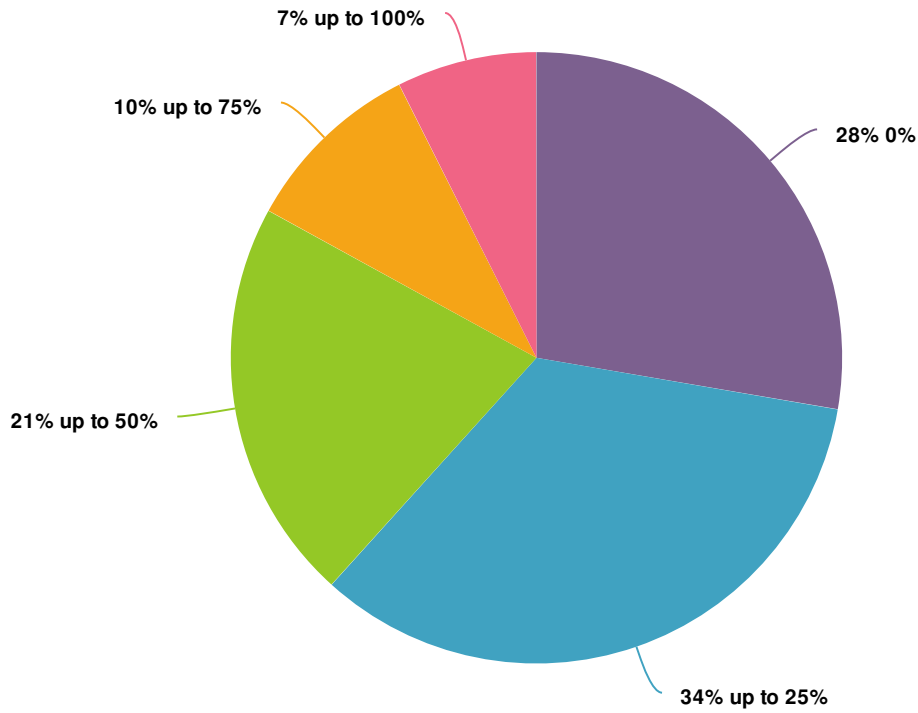

| Value      | Percent | Responses |
|------------|---------|-----------|
| 0%         | 27.7%   | 26        |
| up to 25%  | 34.0%   | 32        |
| up to 50%  | 21.3%   | 20        |
| up to 75%  | 9.6%    | 9         |
| up to 100% | 7.4%    | 7         |

Totals: 94

30. During the COVID-19 pandemic, approximately what percentage of your follow up visits are telemedicine?

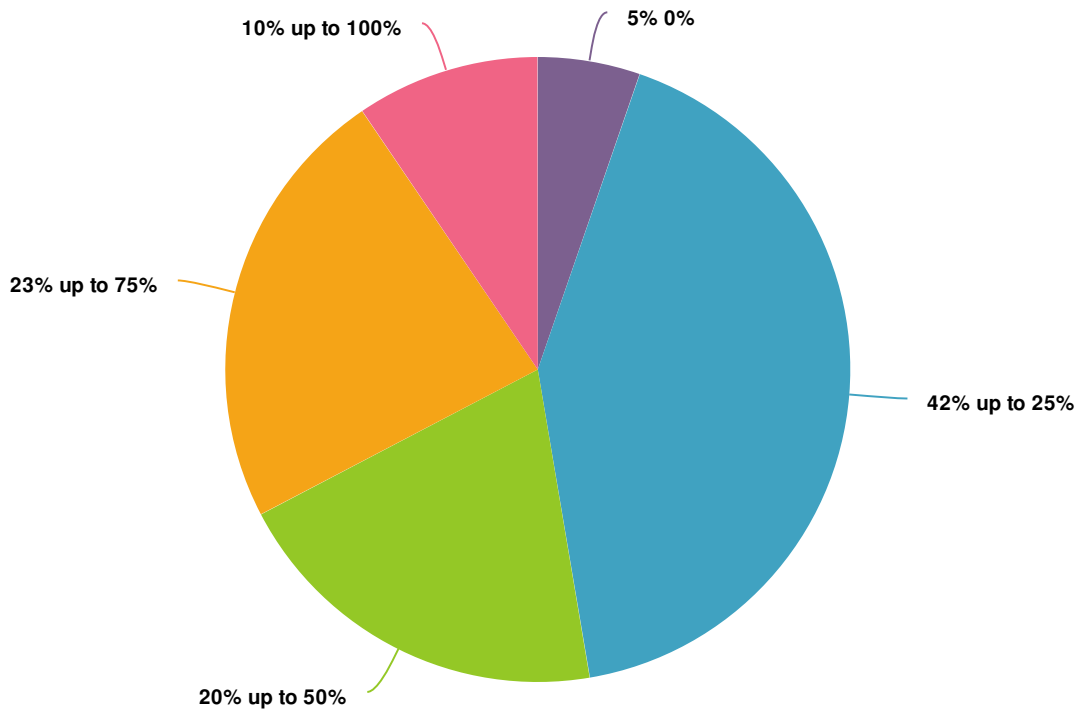

| Value      | Percent | Responses |
|------------|---------|-----------|
| 0%         | 5.3%    | 5         |
| up to 25%  | 42.1%   | 40        |
| up to 50%  | 20.0%   | 19        |
| up to 75%  | 23.2%   | 22        |
| up to 100% | 9.5%    | 9         |

Totals: 95

31. Approximately what percent of your telemedicine visits, are you able to give satisfactory care?

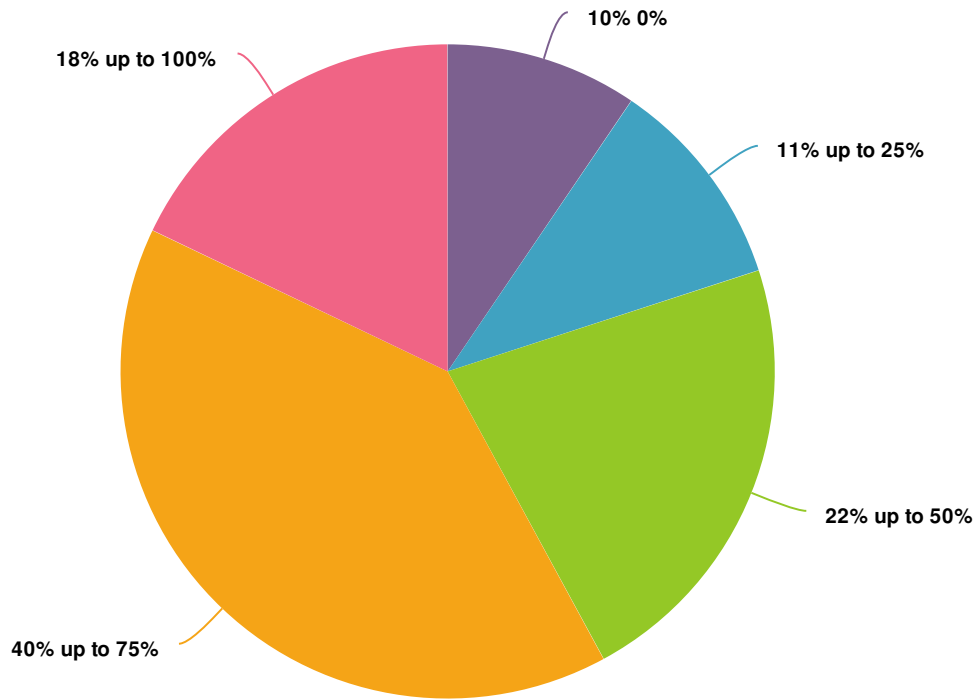

| Value      | Percent | Responses |
|------------|---------|-----------|
| 0%         | 9.5%    | 9         |
| up to 25%  | 10.5%   | 10        |
| up to 50%  | 22.1%   | 21        |
| up to 75%  | 40.0%   | 38        |
| up to 100% | 17.9%   | 17        |

Totals: 95

32. To what extent do you believe with this statement: "I believe telemedicine visits are as effective as in-person visits"?

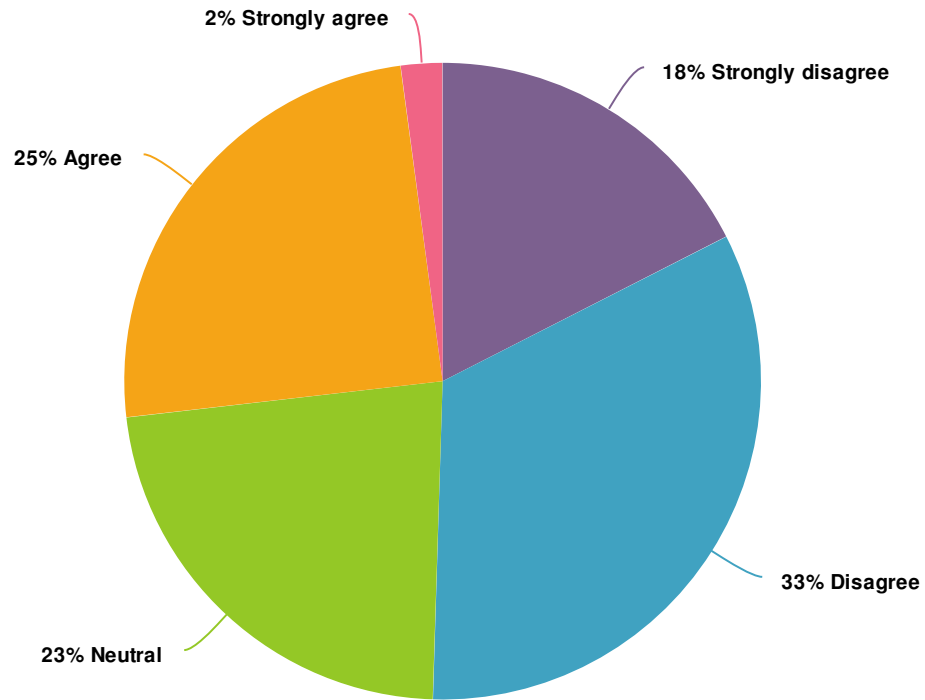

| Value             |                                                                                     | Percent | Responses |
|-------------------|-------------------------------------------------------------------------------------|---------|-----------|
| Strongly disagree |  | 17.5%   | 17        |
| Disagree          |  | 33.0%   | 32        |
| Neutral           |  | 22.7%   | 22        |
| Agree             |  | 24.7%   | 24        |
| Strongly agree    |  | 2.1%    | 2         |

Totals: 97

33. [OLD VERSION] For which purposes do you find telemedicine most difficult? Select all that apply.

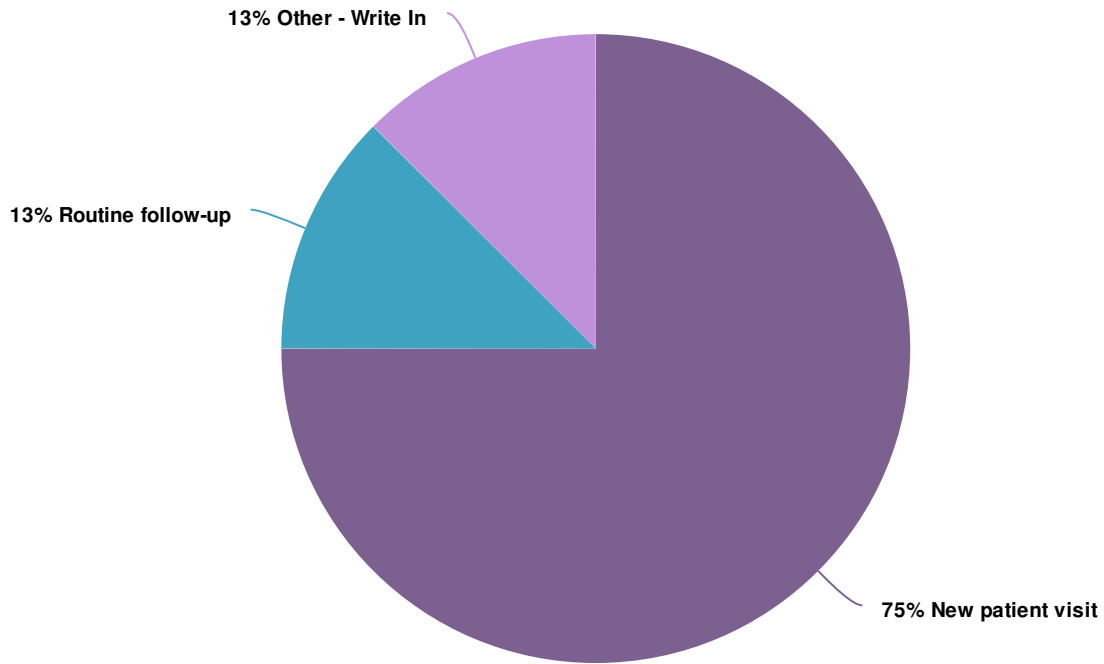

| Value             | Percent | Responses |
|-------------------|---------|-----------|
| New patient visit | 75.0%   | 12        |
| Routine follow-up | 12.5%   | 2         |
| Other - Write In  | 12.5%   | 2         |

Totals: 16

| Other - Write In                                                                                                                   | Count |
|------------------------------------------------------------------------------------------------------------------------------------|-------|
| Need for thorough physical exam                                                                                                    | 1     |
| Unable to select more than one choice above. New patient visit, follow-up patient with new chief complaint, and opioid monitoring. | 1     |
| Totals                                                                                                                             | 2     |

34. For which purposes do you find telemedicine most difficult? Select all that apply.

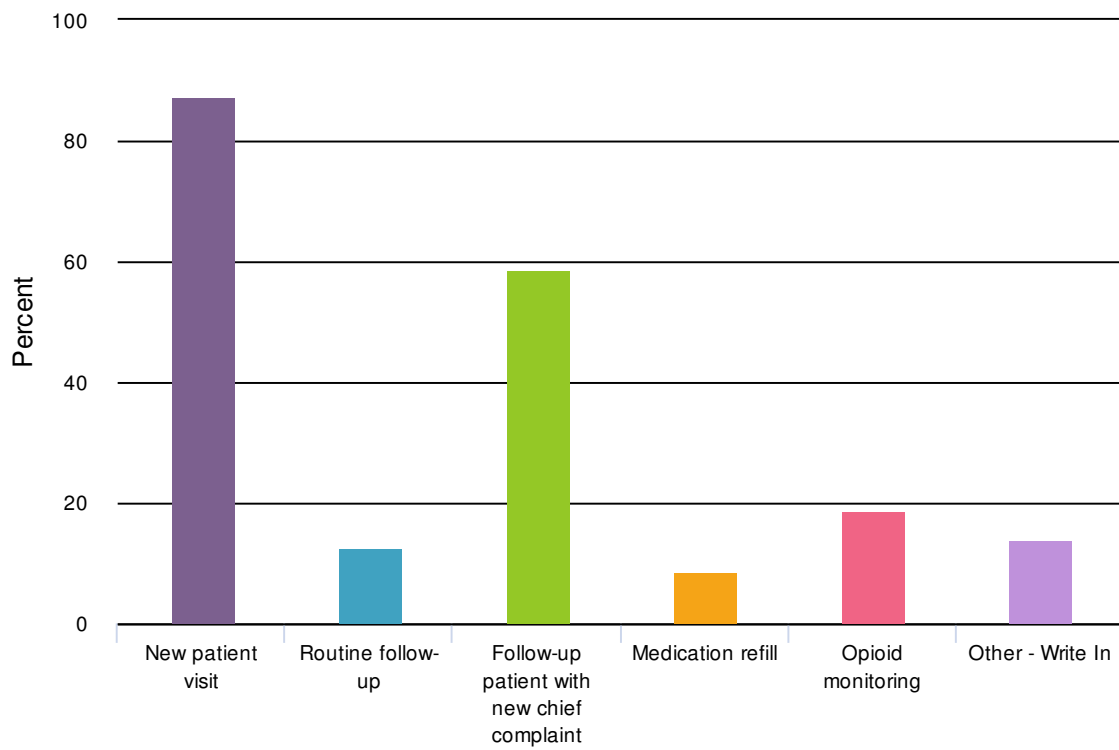

| Value                                      |                                                                                     | Percent | Responses |
|--------------------------------------------|-------------------------------------------------------------------------------------|---------|-----------|
| New patient visit                          |  | 87.5%   | 70        |
| Routine follow-up                          |  | 12.5%   | 10        |
| Follow-up patient with new chief complaint |  | 58.8%   | 47        |
| Medication refill                          |  | 8.8%    | 7         |
| Opioid monitoring                          |  | 18.8%   | 15        |
| Other - Write In                           |  | 13.8%   | 11        |



35. How did your practice setting affect your ability to return to practice?

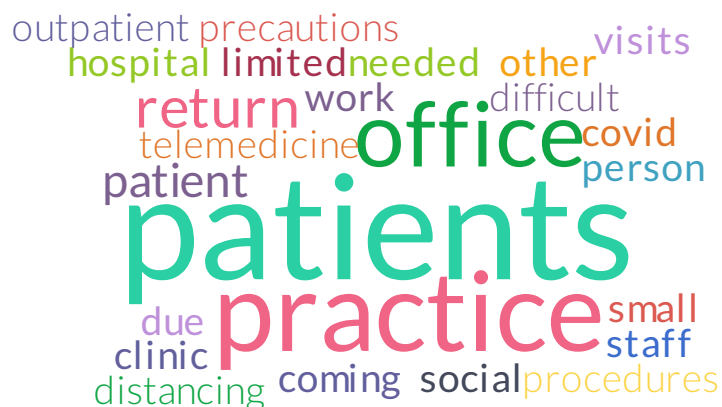

| ResponseID | Response                                                                                                                                                                                                                                                                                                                                                                                                                                                                                                 |
|------------|----------------------------------------------------------------------------------------------------------------------------------------------------------------------------------------------------------------------------------------------------------------------------------------------------------------------------------------------------------------------------------------------------------------------------------------------------------------------------------------------------------|
| 11         | No                                                                                                                                                                                                                                                                                                                                                                                                                                                                                                       |
| 13         | I did not stop practicing in my private practice. I also go to nursing homes, where several facilities barred consultants during the height of COVID, and others encouraged me to come in and see their COVID patients. Some of my private practice patients were justifiably concerned about coming to my office when they heard that I was going to nursing homes and seeing COVID patients on other days. I also barred some of my higher risk patients from coming to my office for the same reason. |
| 16         | People were not coming in.                                                                                                                                                                                                                                                                                                                                                                                                                                                                               |
| 18         | .                                                                                                                                                                                                                                                                                                                                                                                                                                                                                                        |
| 19         | I did exclusively telemedicine for about 3 weeks with markedly reduced patient volume. Then gradual return over another 3-4 weeks to in-person care. At present I am nearly 100% in person with only a few very high risk individuals who prefer to do telemedicine for followup.                                                                                                                                                                                                                        |
| 20         | I am high risk and I have lengthy visits in people's homes. I had to wait for PAPR to become available.                                                                                                                                                                                                                                                                                                                                                                                                  |
| 23         | Helped being outpatient with low overhead.                                                                                                                                                                                                                                                                                                                                                                                                                                                               |
| 24         | We had "mandatory" shut down except for emergency visits. I later learned that not everyone followed that "rule". So although only urgent surgeries and procedures were being performed, other folks were keeping production up by seeing patients in the office. I was doing telemedicine which pays next to nothing                                                                                                                                                                                    |

## ResponseID Response

|    |                                                                                                                                                                                                                        |
|----|------------------------------------------------------------------------------------------------------------------------------------------------------------------------------------------------------------------------|
| 33 | Unable to do procedures for two months, limited office hours                                                                                                                                                           |
| 34 | I was unable to make specific decisions. The organization I work for did setup the telemedicine system, but colleagues in private practice seemed to get setup much quicker                                            |
| 39 | Things were closed. Patients didn't want to come in                                                                                                                                                                    |
| 41 | Primarily elective outpatient care, less of a priority often for patients.                                                                                                                                             |
| 45 | N/A                                                                                                                                                                                                                    |
| 46 | Minimal- use precautions                                                                                                                                                                                               |
| 58 | No                                                                                                                                                                                                                     |
| 61 | Couldn't do elective procedures.                                                                                                                                                                                       |
| 65 | distance , fear of the patients                                                                                                                                                                                        |
| 69 | .                                                                                                                                                                                                                      |
| 72 | We never closed. We just figured out to do telemedicine for rechecks. Our new patient referrals for EMG's and Consults have been slow to recover as referring physicians are just getting started back up.             |
| 75 | None. We never stopped, only implemented precautions.                                                                                                                                                                  |
| 81 | Half of our staff was out during for at least a month which made things very difficult                                                                                                                                 |
| 83 | large hospital clinic- all telehealth for a month or two                                                                                                                                                               |
| 84 | Easier because we are a surgical hospital with healthy patients.                                                                                                                                                       |
| 86 | we are small and nimble so we were able to return quickly                                                                                                                                                              |
| 88 | It is horrible management. I quit that place joining other group                                                                                                                                                       |
| 92 | Initially during COVID-19 pandemic, my practice setting was affected due to state/territory government restrictions of non-emergency medical practices operations for 3-4 weeks. After that, it has not been affected. |
| 94 | small office. needed to decrease number of doctors in office at one time                                                                                                                                               |
| 97 | It did not. We were able to continue practicing and made adjustments as needed.                                                                                                                                        |
| 98 | Less patients and longer with each patient                                                                                                                                                                             |

## ResponseID Response

|     |                                                                                                                                                                                                                                                                                                                                                                                                                                                                                                                                                                       |
|-----|-----------------------------------------------------------------------------------------------------------------------------------------------------------------------------------------------------------------------------------------------------------------------------------------------------------------------------------------------------------------------------------------------------------------------------------------------------------------------------------------------------------------------------------------------------------------------|
| 100 | We had telemedicine capabilities already. So it was a rapid transition.                                                                                                                                                                                                                                                                                                                                                                                                                                                                                               |
| 103 | I primarily perform electrodiagnostic studies so I had to see patients sooner than I wanted to return to practice because of # of referrals and to stay in business.                                                                                                                                                                                                                                                                                                                                                                                                  |
| 105 | only stopped 2 days and started telehealth the next week full schedule                                                                                                                                                                                                                                                                                                                                                                                                                                                                                                |
| 108 | Being independent created financial challenges but it gave me a nimble approach where I could easily change protocols, and also change protocols to suit my level of comfort (ie increased screening, increased time between patients for cleaning, adding air purifier to my office, etc)                                                                                                                                                                                                                                                                            |
| 109 | VA--stricter rules for outpatient/inpatient on SCI units                                                                                                                                                                                                                                                                                                                                                                                                                                                                                                              |
| 110 | Could not see patients in-person for a period of time.                                                                                                                                                                                                                                                                                                                                                                                                                                                                                                                |
| 112 | Independent office allowed for social distancing and limited patient to patient contact                                                                                                                                                                                                                                                                                                                                                                                                                                                                               |
| 116 | No problem                                                                                                                                                                                                                                                                                                                                                                                                                                                                                                                                                            |
| 119 | Initially our building was not accessible due to screening limitations. Now we are minimally affected.                                                                                                                                                                                                                                                                                                                                                                                                                                                                |
| 121 | excellent practice support                                                                                                                                                                                                                                                                                                                                                                                                                                                                                                                                            |
| 124 | Severe pain needing injection same day                                                                                                                                                                                                                                                                                                                                                                                                                                                                                                                                |
| 137 | None now but previously limited due to space to allow for social distancing                                                                                                                                                                                                                                                                                                                                                                                                                                                                                           |
| 143 | we did not stop practicing at all during all this time. we continued with telemedicine visits once the national coronavirus shutdown occurred and still saw very urgent patients in clinic if needed. now we are doing a combination practice of both telemedicine and in office appointments with special precautions in place such as -- extra cleaning, pt's are advise to wash hands before and after appointment, all pt;s get temperature checked before entering building and at our office and everyone that enters building is required to wear a mask, etc. |
| 144 | Rules from hospital administration                                                                                                                                                                                                                                                                                                                                                                                                                                                                                                                                    |
| 147 | Increasing telemedicine                                                                                                                                                                                                                                                                                                                                                                                                                                                                                                                                               |
| 151 | We are restricted to seeing 30 % of patients in the office for social distancing and most are for injections or EMGS                                                                                                                                                                                                                                                                                                                                                                                                                                                  |
| 153 | Inability to perform procedures to test the patients pain.                                                                                                                                                                                                                                                                                                                                                                                                                                                                                                            |
| 155 | Not as restricted with return to outpatient clinic setting as others who work in hospital, surgery center, etc                                                                                                                                                                                                                                                                                                                                                                                                                                                        |

## ResponseID Response

|     |                                                                                                                                                                                      |
|-----|--------------------------------------------------------------------------------------------------------------------------------------------------------------------------------------|
| 156 | Having a solo private practice, made it easier to some extent in adapting to changes needed for return to practice.                                                                  |
| 159 | We had to wait until we had PPE to do Emgs. Even now although I work for a university system I have brought in my own PPE There is very poor social distancing among ancillary staff |
| 163 | Waiting rooms were eliminated                                                                                                                                                        |
| 165 | reduced patient number due to fear of coming to the doctor                                                                                                                           |
| 168 | We were ok but had difficult with tele visit and examining patients                                                                                                                  |
| 170 | It was very difficult but we found a way that works for us.                                                                                                                          |
| 171 | We kept continuing to work                                                                                                                                                           |
| 179 | It was not difficult to incorporate telemedicine into day to day. Was able to examine further and next in person follow up visit if need be.                                         |
| 181 | Just have to exercise precautions and do more telemedicine                                                                                                                           |
| 182 | Adapted with Telemedicine and Surgery Center                                                                                                                                         |
| 184 | University determined policy                                                                                                                                                         |
| 188 | organizational decisions lead the way over individual practice                                                                                                                       |
| 189 | The medical center where I practiced became the Covid treatment center and I had to relocate to a very small space in a friend's office.                                             |
| 190 | Less staff                                                                                                                                                                           |
| 191 | Less clinics                                                                                                                                                                         |
| 192 | Patients reluctant to leave their homes and command                                                                                                                                  |
| 193 | pressures to return to practice, not adequate PPE to providers, though consistent with some local standards at other hospitals (though not with others)                              |
| 195 | Had to abide by university wide conditions for reopening                                                                                                                             |
| 202 | It has a minimal impact as Covid rates are currently low in my area                                                                                                                  |
| 205 | Lost 6 weeks of work and income.                                                                                                                                                     |

## ResponseID Response

|     |                                                                                                                                                                                                                                                                                                                                                                                                                                                                                                                                                         |
|-----|---------------------------------------------------------------------------------------------------------------------------------------------------------------------------------------------------------------------------------------------------------------------------------------------------------------------------------------------------------------------------------------------------------------------------------------------------------------------------------------------------------------------------------------------------------|
| 207 | My practice setting being an academic institution was the primary driver affecting my return to practice.                                                                                                                                                                                                                                                                                                                                                                                                                                               |
| 212 | Loss of access to procedures, supplies                                                                                                                                                                                                                                                                                                                                                                                                                                                                                                                  |
| 213 | Unable to purchase disinfectants and PPE at reasonable price. Prices has gone up and it is difficult for a small solo practice to make a profitable business to stay in market.                                                                                                                                                                                                                                                                                                                                                                         |
| 216 | decreased referrals, increase need to distance, sanitize                                                                                                                                                                                                                                                                                                                                                                                                                                                                                                |
| 217 | I'm part of a hospital system and so my return to practice wasnt affected drastically                                                                                                                                                                                                                                                                                                                                                                                                                                                                   |
| 219 | Initially 6 weeks of no in-person visits (except for urgent issues), then slowly increased in-person clinic schedule for the next 3 months                                                                                                                                                                                                                                                                                                                                                                                                              |
| 227 | none                                                                                                                                                                                                                                                                                                                                                                                                                                                                                                                                                    |
| 228 | No affect                                                                                                                                                                                                                                                                                                                                                                                                                                                                                                                                               |
| 230 | Limited accommodation and safety enforcement                                                                                                                                                                                                                                                                                                                                                                                                                                                                                                            |
| 232 | difficult to complete EDX studies given restrictions in contact                                                                                                                                                                                                                                                                                                                                                                                                                                                                                         |
| 233 | I think no                                                                                                                                                                                                                                                                                                                                                                                                                                                                                                                                              |
| 234 | Difficulty with having multiple providers in a clinical or work space given need to social distance while at work. Part of my practice is in pediatric sports medicine, and patient volume has also been slow to increase back to normal due to the impact on sports. As I have been transitioning from fellowship to my new position as an attending at a new institution, this has impacted what I originally negotiated in my contract on how much pediatric sports medicine I am able to practice vs my other practice in pediatric rehabilitation. |
| 236 | Needed protocols for screening pts coming into office, protocols for keeping staff safe                                                                                                                                                                                                                                                                                                                                                                                                                                                                 |
| 240 | Mandated closure for a few weeks. Then limited patient numbers in office. New patient staying home for the pandemic and limited ability to find safe transportation to clinic.                                                                                                                                                                                                                                                                                                                                                                          |
| 242 | I had to make sure that we quickly implemented an appropriate telemedicine platform to begin seeing patients.                                                                                                                                                                                                                                                                                                                                                                                                                                           |
| 247 | didnt affect me                                                                                                                                                                                                                                                                                                                                                                                                                                                                                                                                         |
| 252 | Did not have an effect.                                                                                                                                                                                                                                                                                                                                                                                                                                                                                                                                 |



| ResponseID | Response                                                                                                                                                      |
|------------|---------------------------------------------------------------------------------------------------------------------------------------------------------------|
| 41         | Yes, decreased by 30%                                                                                                                                         |
| 45         | N/a                                                                                                                                                           |
| 46         | Unchanged                                                                                                                                                     |
| 58         | No                                                                                                                                                            |
| 61         | Staff out more frequently for 2 weeks for quarantine                                                                                                          |
| 65         | the hours have been cut short , more PPEs                                                                                                                     |
| 69         | The same amount                                                                                                                                               |
| 72         | We cut back on staff when we were just doing telemedicine visits.                                                                                             |
| 75         | None                                                                                                                                                          |
| 81         | We are still short staffed but are in the process of hiring . We have had to make sure our staff practices social distancing and has appropriate PPE          |
| 83         | staff having to leave the clinic/ resign to care for kids who are on cyberschool                                                                              |
| 84         | Hiring more staff as time has gone on.                                                                                                                        |
| 86         | yes laying off due to lack of volume                                                                                                                          |
| 88         | People were on fmla                                                                                                                                           |
| 92         | Staff has been relatively unchanged except for those employees with administrative functions not required for patient care that are working remote from home. |
| 94         | yes                                                                                                                                                           |
| 97         | No                                                                                                                                                            |
| 98         | More time with each patient and telemedicine                                                                                                                  |
| 100        | There have been a lot of transitions.                                                                                                                         |
| 103        | No change but put up barriers, modified work site and assigned cleaning duties to staff. Had to ensure staff was comfortable and felt safe.                   |
| 105        | no changes                                                                                                                                                    |
| 108        | no                                                                                                                                                            |

| ResponseID | Response                                                                                                                                                                                                                            |
|------------|-------------------------------------------------------------------------------------------------------------------------------------------------------------------------------------------------------------------------------------|
| 109        | unchanged                                                                                                                                                                                                                           |
| 110        | No change now.                                                                                                                                                                                                                      |
| 112        | No                                                                                                                                                                                                                                  |
| 114        | We see less patients in the clinic and have fewer docs in clinic to allow less congestion in the waiting area for social distancing.                                                                                                |
| 116        | Some employee worked from home. Employee childcare issues. Changing emg/ncs procedures, change in toxicology testing protocols, changes in person to person availability                                                            |
| 119        | No staffing changes. Many team members telework.                                                                                                                                                                                    |
| 121        | staff reassignment occurring to meet team needs                                                                                                                                                                                     |
| 124        | None. I work for the VA and have no input on staffing.                                                                                                                                                                              |
| 137        | No impact                                                                                                                                                                                                                           |
| 138        | No change                                                                                                                                                                                                                           |
| 143        | initially there was less need for near 1:1 nurse staffing and less need for front staff workers due to less patients in office and more telemedicine, but this has slowly returned to about 50-75% of where we were about 1 yr ago. |
| 144        | more staff hired-especially recently                                                                                                                                                                                                |
| 147        | No                                                                                                                                                                                                                                  |
| 151        | not changed                                                                                                                                                                                                                         |
| 153        | No changes                                                                                                                                                                                                                          |
| 155        | We have added staff over the past few months                                                                                                                                                                                        |
| 156        | Yes. Reduced number of staff.                                                                                                                                                                                                       |
| 159        | We are really short.                                                                                                                                                                                                                |
| 163        | n/a                                                                                                                                                                                                                                 |
| 165        | Occasional furloughs of staff                                                                                                                                                                                                       |
| 168        | Slightly                                                                                                                                                                                                                            |



**ResponseID Response**

170 We lost a few staff because of the \$600/week unemployment. Three girls came back after 7/31 because they wanted to collect the extra unemployment which affected our practice tremendously.

171 Loss of 1 staff member with young children

179 No changes.

181 No

182 Yes. Mostly gone. Doing more outsourcing and myself

184 Reduced staffing

188 none

189 My secretary stated home until we were able to see patients at in office again

191 Downsized and furloughed

192 Multiple furloughs, most have been brought back

193 yes

194 Yes One retired afraid of Covid

195 Yes, limitation for ancillary personnel not physicians

202 I have assistance with virtual rooming for my Telehealth patients.

205 no change

207 Protective measures have been instituted, but staffing has not directly changed since COVID.

212 Reduced by 1/3

213 Decrease hours and hesitant to hear more help, which is needed. Everyone is being stretch thin.

216 decreased hours but paid normal salary

217 Yes. Some of our MAs were sent to labor pools which made put more pressure on us physicians in terms of returning patient phone calls and messages.

219 Some staff were furloughed for a few months during pandemic

**ResponseID Response**

---

227 none

228 No change

230 Yes, reduced

232 none

233 your workload has decreased

234 Some nursing and admin staff are able to work remotely. Still have athletic trainers helping to staff in clinic in-person. Decrease in multidisciplinary clinics being held.

236 Less staffing with so many people sick or under investigation.

240 Decrease number to assist due to decreased patient load.

242 No

247 some of them stop working

252 No

37. What has been the biggest challenge to your outpatient care during the COVID-19 pandemic and why?

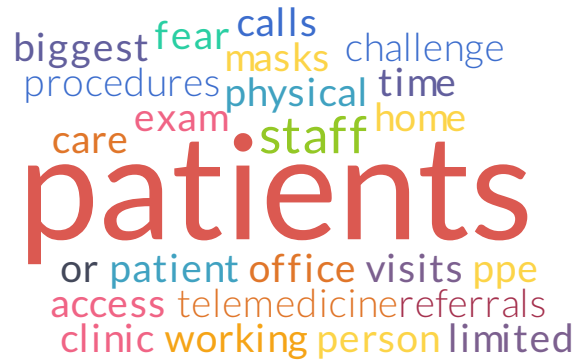

| ResponseID | Response                                                                                                                                                                                     |
|------------|----------------------------------------------------------------------------------------------------------------------------------------------------------------------------------------------|
| 9          | Ensuring patients and staff follow appropriate mitigation strategies.                                                                                                                        |
| 11         | First time patient telemedicine. Not able to examine them                                                                                                                                    |
| 13         | Patients deciding that COVID gives them an excuse to stay home, not move, and to overeat.                                                                                                    |
| 16         | Having patients not be scared to come in                                                                                                                                                     |
| 18         | Impact on clinic revenue                                                                                                                                                                     |
| 19         | \$\$\$\$\$\$\$\$ No volume, decreased volume = decreased \$\$\$                                                                                                                              |
| 20         | PPE and aerosol filtration.                                                                                                                                                                  |
| 23         | Exposure risk to SARS-CoV-2 coronavirus.                                                                                                                                                     |
| 24         | Opioid medication monitoring and balancing the need for pain control with other safety factors                                                                                               |
| 26         | Lack of information                                                                                                                                                                          |
| 33         | Reassuring patients that our office is safe                                                                                                                                                  |
| 34         | Early on it was getting approval to do procedures. Now it's making sure we have enough masks and we have a increase percentage of same day cancellations do to possible symptoms of COVID 19 |

## ResponseID Response

|    |                                                                                                                                                                                                                                                                           |
|----|---------------------------------------------------------------------------------------------------------------------------------------------------------------------------------------------------------------------------------------------------------------------------|
| 39 | In our practice it was that we had to cease doing EMGs since elective procedures were closed.                                                                                                                                                                             |
| 41 | Financial uncertainty and changing regulations.                                                                                                                                                                                                                           |
| 46 | Hard to do complete physical exams                                                                                                                                                                                                                                        |
| 58 | No                                                                                                                                                                                                                                                                        |
| 61 | Elective procedure shut down                                                                                                                                                                                                                                              |
| 65 | fear of infection, of one of the patients, or staff or ourselves and the use of PPE and the economic factor                                                                                                                                                               |
| 69 | .                                                                                                                                                                                                                                                                         |
| 72 | Not being able to get MRI's, CT scans, and other tests. Not being able to have surgeons evaluate patients because their offices were closed except for emergencies. Hospital services were closed except for emergencies.                                                 |
| 75 | Lack of referrals and wearing masks all day.                                                                                                                                                                                                                              |
| 81 | Staffing has been a real problem for my practice. We are short staffed which puts more stress on everyone else. It is also difficult to effectively communicate with our patients when we don't have the staff to do so                                                   |
| 83 | getting adequate rehab care for older individuals availability of staff                                                                                                                                                                                                   |
| 84 | Patients having to wear masks and being uncomfortable.                                                                                                                                                                                                                    |
| 86 | contact tracing. if you are "exposed" to someone do you stay home for 2 weeks? this applies to staff and patients.                                                                                                                                                        |
| 88 | Not being able to visualize and potential errors                                                                                                                                                                                                                          |
| 92 | Our biggest challenge has been to maintain physical therapy patients to attend face-to-face visits. Also, telemedicine visits with medicare/medicaid patients who are not familiarized with technology or do not have the resources for an optimal videoconference visit. |
| 94 | running an office and adjusting staffing requirements due to illness, exposure, need to stay at home due to closed schools, controlling costs to stay afloat!                                                                                                             |
| 97 | When we were ready to open, convincing patients that we provide appropriate safety measures to allow in-person visits.                                                                                                                                                    |
| 98 | Physical exam over the computer                                                                                                                                                                                                                                           |

## ResponseID Response

|     |                                                                                                                                                                                                                                                                                                                                                                                                 |
|-----|-------------------------------------------------------------------------------------------------------------------------------------------------------------------------------------------------------------------------------------------------------------------------------------------------------------------------------------------------------------------------------------------------|
| 100 | Not being able to do procedures                                                                                                                                                                                                                                                                                                                                                                 |
| 103 | Biggest challenge is having enough time between patients to clean equipment and exam rooms. Makes scheduling challenging and I see much less patients as compared to prior to COVID.                                                                                                                                                                                                            |
| 105 | zoom connections with low tech clinician=me and low tech patients. My staff are Super Users and facilitate everything for me                                                                                                                                                                                                                                                                    |
| 108 | Financially staying viable with decreased appointments but increased costs of PPE, cleaning supplies, etc                                                                                                                                                                                                                                                                                       |
| 109 | the constantly changing rules and procedures, pushback from medical center to get even emergency access to patients sometimes                                                                                                                                                                                                                                                                   |
| 110 | None at this time unless some people are not coming for new eval because of fear of infection that i am not aware of.                                                                                                                                                                                                                                                                           |
| 112 | Limited in-office new referrals                                                                                                                                                                                                                                                                                                                                                                 |
| 114 | Updating protocol and making sure the entire staff (front desk, physicians, nurses, MA, admin, patients) are all on the same page                                                                                                                                                                                                                                                               |
| 116 | EMG nerve conduction studies/urine toxicology testing                                                                                                                                                                                                                                                                                                                                           |
| 119 | Patients who don't show up for appointments.                                                                                                                                                                                                                                                                                                                                                    |
| 121 | patient ability to comply with treatment program due to restricted access to services                                                                                                                                                                                                                                                                                                           |
| 124 | Diminished productivity from staff working from home, which carried over when they returned to work. This affected patient care as patients were not receiving reassurance calls or telehealth appointment calls in a timely manner. Patients' mental health conditions worsened, which worsened subjective pain level. Providing social support for patients without a social worker on staff. |
| 137 | Limited community resources. Not knowing what is open and what is not. Some therapy practices are only doing telehealth                                                                                                                                                                                                                                                                         |
| 138 | Lower volume. Keeping office safe. Hate wearing masks all day                                                                                                                                                                                                                                                                                                                                   |

## ResponseID Response

|     |                                                                                                                                                                                                                                                                                                                                                                                                                                                                                                                                                                                                                                                                                                                                                                                                                                                                                                                                                                                                                                                                                                                                                                                                                                                                                                                                                                                                                             |
|-----|-----------------------------------------------------------------------------------------------------------------------------------------------------------------------------------------------------------------------------------------------------------------------------------------------------------------------------------------------------------------------------------------------------------------------------------------------------------------------------------------------------------------------------------------------------------------------------------------------------------------------------------------------------------------------------------------------------------------------------------------------------------------------------------------------------------------------------------------------------------------------------------------------------------------------------------------------------------------------------------------------------------------------------------------------------------------------------------------------------------------------------------------------------------------------------------------------------------------------------------------------------------------------------------------------------------------------------------------------------------------------------------------------------------------------------|
| 143 | <p>the biggest challenge is when patients come to the outpatient clinic ill. in july I had a patient show up to clinic wanting an injection, but just a couple days prior she had come down with headache and diarrhea and was under investigation for COVID (test still pending) and was not following the self isolation protocols. this pt was demanding to be seen and have the injection despite these symptoms. pt was angry when we recommended it was safer to reschedule at a later date, after testing returned and pt's symptoms were improved, though she did eventually agreed to this. it turns out her test came back for COVID and her symptoms got worse in the next 1 week after this. also 2 - 3 weeks prior to the national shutdown and prior to our facility having an improved system in place for temperature checks and universal face masking, I had 2 challenging patients in my outpatient clinic. the 1st pt, a 23 yo male with URI and much coughing (he did not follow the recommendations for self isolation) and came for an EMG and another pt who had severe pain and temperature of 102 that were seen in our clinic (the latter pt ended up being hospitalized that day). given the lack of access to rapid testing in the beginning of the pandemic and it was difficult to tell initially if my staff or I were exposed to the virus during our interaction with these patients.</p> |
| 144 | <p>procedures being cancelled-limits ability to deliver care</p>                                                                                                                                                                                                                                                                                                                                                                                                                                                                                                                                                                                                                                                                                                                                                                                                                                                                                                                                                                                                                                                                                                                                                                                                                                                                                                                                                            |
| 147 | <p>limited evaluation may lead to insufficient and ineffective care.</p>                                                                                                                                                                                                                                                                                                                                                                                                                                                                                                                                                                                                                                                                                                                                                                                                                                                                                                                                                                                                                                                                                                                                                                                                                                                                                                                                                    |
| 151 | <p>Having to do video visits because of some technical difficulty at times setting them up</p>                                                                                                                                                                                                                                                                                                                                                                                                                                                                                                                                                                                                                                                                                                                                                                                                                                                                                                                                                                                                                                                                                                                                                                                                                                                                                                                              |
| 153 | <p>Lower patient volume</p>                                                                                                                                                                                                                                                                                                                                                                                                                                                                                                                                                                                                                                                                                                                                                                                                                                                                                                                                                                                                                                                                                                                                                                                                                                                                                                                                                                                                 |
| 155 | <p>Requirement for some patients to followup in order to do pill count, UDS, etc</p>                                                                                                                                                                                                                                                                                                                                                                                                                                                                                                                                                                                                                                                                                                                                                                                                                                                                                                                                                                                                                                                                                                                                                                                                                                                                                                                                        |
| 156 | <p>maintaining cash flow during the time of severely limited in office visits... no patients, no income.</p>                                                                                                                                                                                                                                                                                                                                                                                                                                                                                                                                                                                                                                                                                                                                                                                                                                                                                                                                                                                                                                                                                                                                                                                                                                                                                                                |
| 159 | <p>Let's face it telemedicine is a crappy substitute for a physical exam and elderly people can't do it anyway. You can't do emg over telemedicine unless you are a true fraudster ! It was tough working when I wasn't feeling well. Admin wants us to be busy - there's a real disconnect from the c suite</p>                                                                                                                                                                                                                                                                                                                                                                                                                                                                                                                                                                                                                                                                                                                                                                                                                                                                                                                                                                                                                                                                                                            |
| 163 | <p>patients' fear</p>                                                                                                                                                                                                                                                                                                                                                                                                                                                                                                                                                                                                                                                                                                                                                                                                                                                                                                                                                                                                                                                                                                                                                                                                                                                                                                                                                                                                       |
| 165 | <p>Patients fear of coming to clinic, reduced referrals due to reduced PCP appointments in the community so low census</p>                                                                                                                                                                                                                                                                                                                                                                                                                                                                                                                                                                                                                                                                                                                                                                                                                                                                                                                                                                                                                                                                                                                                                                                                                                                                                                  |
| 168 | <p>Making patients feel comfortable</p>                                                                                                                                                                                                                                                                                                                                                                                                                                                                                                                                                                                                                                                                                                                                                                                                                                                                                                                                                                                                                                                                                                                                                                                                                                                                                                                                                                                     |
| 170 | <p>Staffing has my biggest challenge.</p>                                                                                                                                                                                                                                                                                                                                                                                                                                                                                                                                                                                                                                                                                                                                                                                                                                                                                                                                                                                                                                                                                                                                                                                                                                                                                                                                                                                   |
| 171 | <p>The superficial physical exam</p>                                                                                                                                                                                                                                                                                                                                                                                                                                                                                                                                                                                                                                                                                                                                                                                                                                                                                                                                                                                                                                                                                                                                                                                                                                                                                                                                                                                        |
| 173 | <p>Support staff have been less reliable as they have been affected stress. Chronically working short handed</p>                                                                                                                                                                                                                                                                                                                                                                                                                                                                                                                                                                                                                                                                                                                                                                                                                                                                                                                                                                                                                                                                                                                                                                                                                                                                                                            |

**ResponseID Response**

|     |                                                                                                                                                                                               |
|-----|-----------------------------------------------------------------------------------------------------------------------------------------------------------------------------------------------|
| 179 | Getting patients in the region to understand the pandemic is real and eating masks is necessary.                                                                                              |
| 181 | Decreased revenue                                                                                                                                                                             |
| 182 | No physical exam                                                                                                                                                                              |
| 184 | Reduced referral volume. Patients refusing telemedicine and preferring to delay for in person visits                                                                                          |
| 188 | community dissemination, testing, and PPE                                                                                                                                                     |
| 189 | Sanitizing the exam room between patients as I now have only one exam room                                                                                                                    |
| 190 | Patients are not wanting to go to physical therapy                                                                                                                                            |
| 191 | Maintaining mask wearing requirements                                                                                                                                                         |
| 192 | Significant number of telemedicine calls initially. Unable to examine patients to assist with treatment plan. Now most are again in person visits                                             |
| 193 | not having N95s for EMGs                                                                                                                                                                      |
| 194 | Scheduling procedures                                                                                                                                                                         |
| 195 | Unable to see new patients in the office. Tried some by telemed but this was challenging                                                                                                      |
| 202 | Having too much time dedicated to Telehealth and not many patients agreeing to have their care managed with a Telehealth visit.                                                               |
| 205 | telemedicine limits important neuro exam                                                                                                                                                      |
| 207 | Meeting the needs of referrals has been the biggest challenge.                                                                                                                                |
| 212 | Access to supply and facilities, loss of referrals                                                                                                                                            |
| 213 | Cancellation, unsure about billing changes, unable to do procedures since patients prefers not to do injections and come in for doctors visit due to copay or lost their insurance, jobs etc. |
| 216 | referrals working less, fear of pts coming in to the office                                                                                                                                   |
| 217 | Responding to the increase in patients messages/phone calls/emails because more patients are inactive, at home, and have more time to "live in their pain"                                    |
| 219 | Limiting in-person clinic volume, maintaining precautions and social distancing                                                                                                               |

## ResponseID Response

|     |                                                                                                                                                                                                                                                                                                                                                                                                                                                                                                                                                                                                                                                                                                                                                                                                                                                                                                                                                                                                                                                                                                              |
|-----|--------------------------------------------------------------------------------------------------------------------------------------------------------------------------------------------------------------------------------------------------------------------------------------------------------------------------------------------------------------------------------------------------------------------------------------------------------------------------------------------------------------------------------------------------------------------------------------------------------------------------------------------------------------------------------------------------------------------------------------------------------------------------------------------------------------------------------------------------------------------------------------------------------------------------------------------------------------------------------------------------------------------------------------------------------------------------------------------------------------|
| 227 | Decrease the number of patients                                                                                                                                                                                                                                                                                                                                                                                                                                                                                                                                                                                                                                                                                                                                                                                                                                                                                                                                                                                                                                                                              |
| 228 | Lost video conferences, poor wifi of patient, dropped calls/visits. Inability to do physical exam virtually for most MSK issues.                                                                                                                                                                                                                                                                                                                                                                                                                                                                                                                                                                                                                                                                                                                                                                                                                                                                                                                                                                             |
| 230 | Patients do not understand safety needs. Administration wants to accommodate patients. Patients first over staff safety.                                                                                                                                                                                                                                                                                                                                                                                                                                                                                                                                                                                                                                                                                                                                                                                                                                                                                                                                                                                     |
| 232 | see patients in person                                                                                                                                                                                                                                                                                                                                                                                                                                                                                                                                                                                                                                                                                                                                                                                                                                                                                                                                                                                                                                                                                       |
| 233 | I have had to take careful measures for the approach to the consultation and the patients are satisfied and accept the new system with pleasure                                                                                                                                                                                                                                                                                                                                                                                                                                                                                                                                                                                                                                                                                                                                                                                                                                                                                                                                                              |
| 234 | Burn-out from so much screen time on the computer. We already were facing this burden with documentation prior to the pandemic, and now with so much telehealth, virtual conferences, dept/staff meetings, etc, it has gotten worse. While I liked telehealth prior to the pandemic and still think there is a role for it, there is still much improvement needed to make it more efficient and effective (e.g. physicians shouldn't have to deal with troubleshooting why patients/families cannot access the telehealth visit or why their video isn't working, there needs to be more efficient ways to demonstrate physical exam maneuvers via telehealth such as little avatars that demonstrate the maneuver - I have been either verbally instructing patients/families or demonstrating exam maneuvers on myself to have patients do it but even then, often have to correct their exam maneuver frequently). In addition, there are even more emails than ever to keep up with regarding updates with the pandemic and new guidelines constantly being released or news to keep up with the virus. |
| 236 | PPE- shortages, acquisitions, getting staff to mask around each other when supervision not around                                                                                                                                                                                                                                                                                                                                                                                                                                                                                                                                                                                                                                                                                                                                                                                                                                                                                                                                                                                                            |
| 240 | Connectivity, Variable patient access and load on limited servers on our side to handle video visits by multiple doctors and staff.                                                                                                                                                                                                                                                                                                                                                                                                                                                                                                                                                                                                                                                                                                                                                                                                                                                                                                                                                                          |
| 242 | Safely bringing in patients. I have had to limit the staff exposure to patients to make sure they have a safe work environment and have had to then do a lot more of my own data entry. I believe telemed visits are a good screening tool prior to bringing patients into the office for their physical examinations. I do believe though that nothing replaces a good physical exam.                                                                                                                                                                                                                                                                                                                                                                                                                                                                                                                                                                                                                                                                                                                       |
| 247 | they didnt want to get out of home                                                                                                                                                                                                                                                                                                                                                                                                                                                                                                                                                                                                                                                                                                                                                                                                                                                                                                                                                                                                                                                                           |
| 252 | Making sure patients were compliant in wearing masks.                                                                                                                                                                                                                                                                                                                                                                                                                                                                                                                                                                                                                                                                                                                                                                                                                                                                                                                                                                                                                                                        |



38. Since the COVID-19 outbreak, what type of setting have you worked in? Select all that apply.

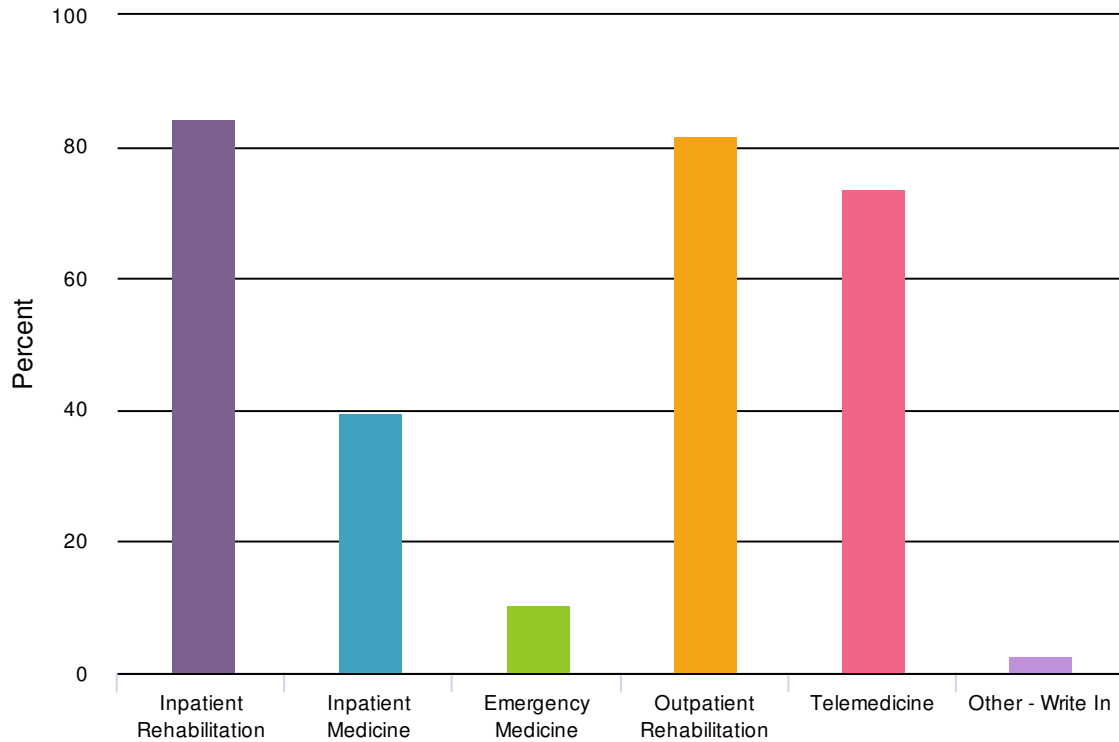

| Value                     |                                                                                     | Percent | Responses |
|---------------------------|-------------------------------------------------------------------------------------|---------|-----------|
| Inpatient Rehabilitation  |  | 84.2%   | 32        |
| Inpatient Medicine        |  | 39.5%   | 15        |
| Emergency Medicine        |  | 10.5%   | 4         |
| Outpatient Rehabilitation |  | 81.6%   | 31        |
| Telemedicine              |  | 73.7%   | 28        |
| Other - Write In          |  | 2.6%    | 1         |

| Other - Write In        | Count |
|-------------------------|-------|
| Rehabilitation Consults | 1     |
| Totals                  | 1     |

39. How was your training interrupted by the COVID-19 pandemic? Select all that apply.

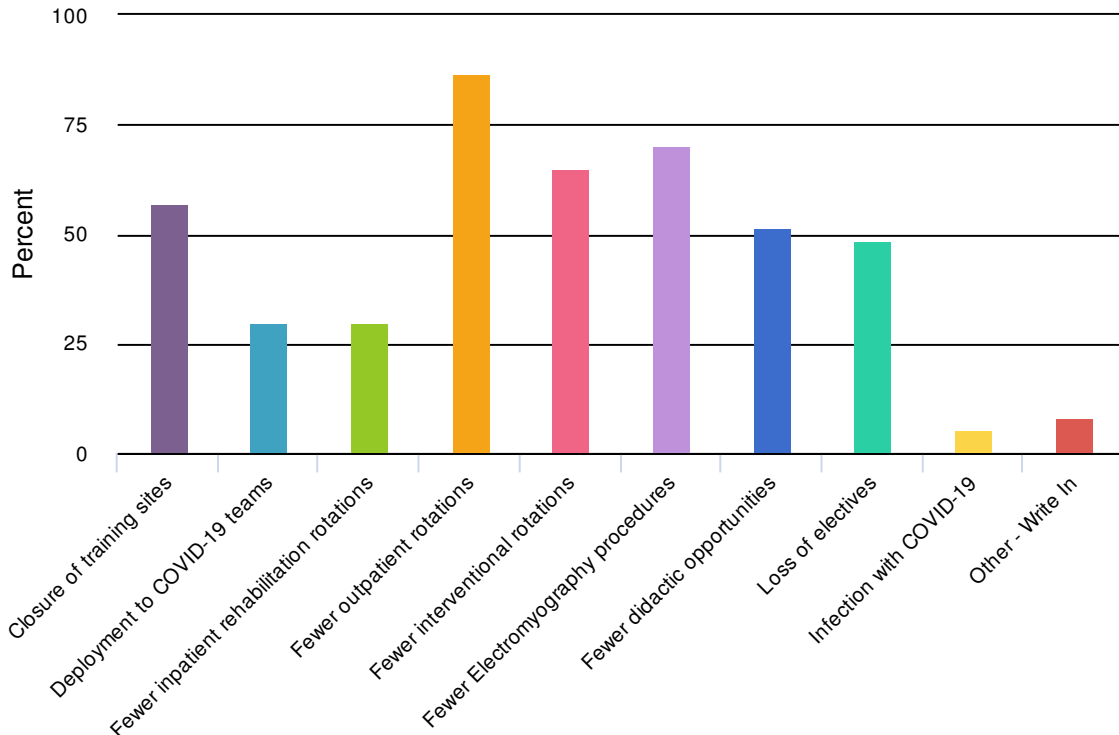

| Value                                    | Percent | Responses |
|------------------------------------------|---------|-----------|
| Closure of training sites                | 56.8%   | 21        |
| Deployment to COVID-19 teams             | 29.7%   | 11        |
| Fewer inpatient rehabilitation rotations | 29.7%   | 11        |
| Fewer outpatient rotations               | 86.5%   | 32        |
| Fewer interventional rotations           | 64.9%   | 24        |
| Fewer Electromyography procedures        | 70.3%   | 26        |
| Fewer didactic opportunities             | 51.4%   | 19        |
| Loss of electives                        | 48.6%   | 18        |
| Infection with COVID-19                  | 5.4%    | 2         |
| Other - Write In                         | 8.1%    | 3         |

| <b>Other - Write In</b>                                             | <b>Count</b> |
|---------------------------------------------------------------------|--------------|
| Fewer patients                                                      | 1            |
| Increased personal stress / family worry                            | 1            |
| Longer work hours with sicker rehab patients on inpatient rotations | 1            |
| Totals                                                              | 3            |

40. Which training sites were most affected by the COVID-19 pandemic? Select all that apply.

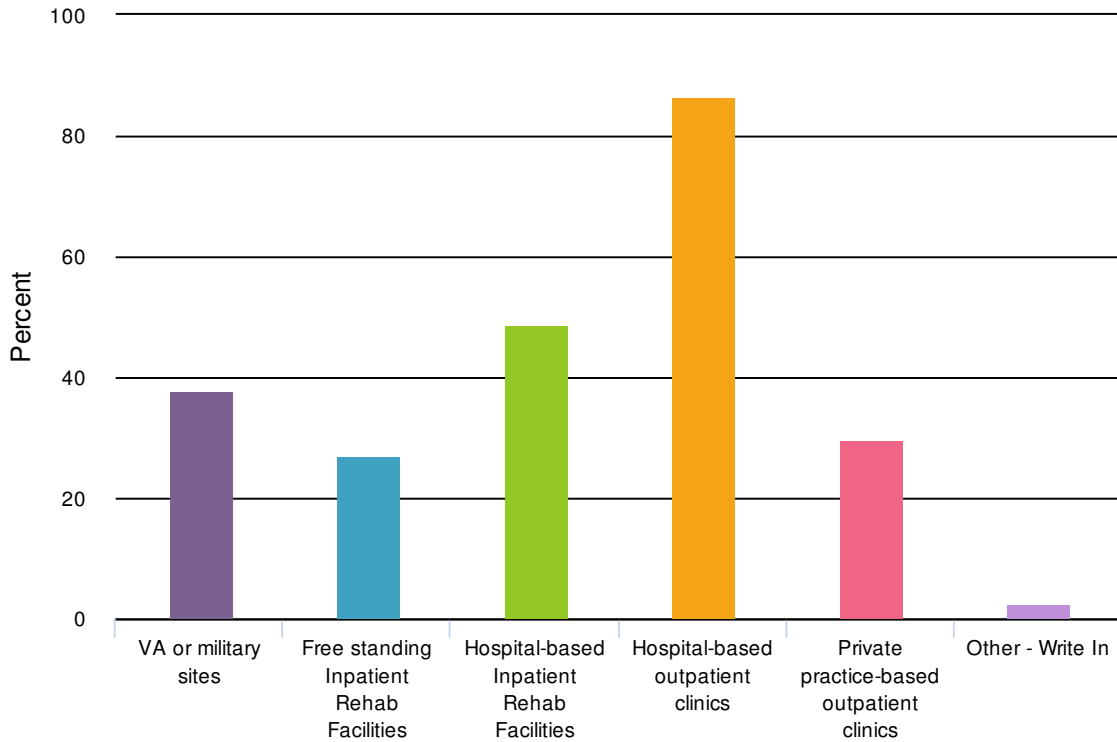

| Value                                     | Percent | Responses |
|-------------------------------------------|---------|-----------|
| VA or military sites                      | 37.8%   | 14        |
| Free standing Inpatient Rehab Facilities  | 27.0%   | 10        |
| Hospital-based Inpatient Rehab Facilities | 48.6%   | 18        |
| Hospital-based outpatient clinics         | 86.5%   | 32        |
| Private practice-based outpatient clinics | 29.7%   | 11        |
| Other - Write In                          | 2.7%    | 1         |

| Other - Write In         | Count |
|--------------------------|-------|
| university-based clinics | 1     |
| Totals                   | 1     |

41. What concerns you regarding the consequences of COVID-19 pandemic on your training? Select all that apply.

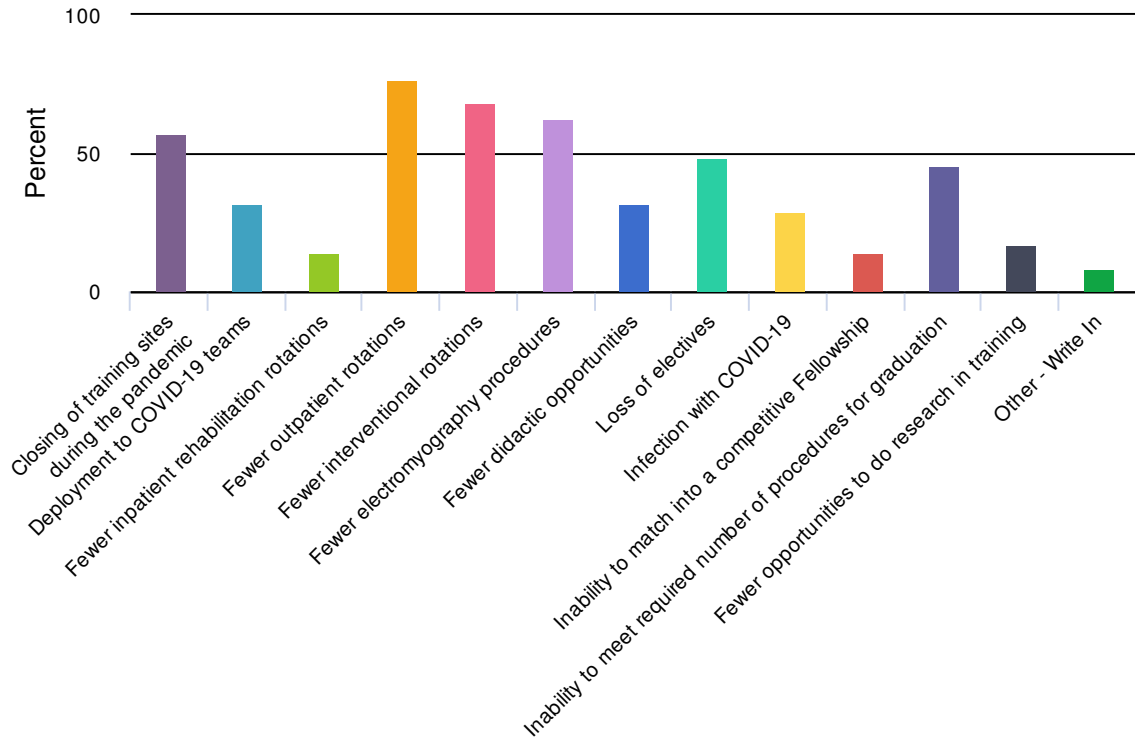

| Value                                                          |  | Percent | Responses |
|----------------------------------------------------------------|--|---------|-----------|
| Closing of training sites during the pandemic                  |  | 57.1%   | 20        |
| Deployment to COVID-19 teams                                   |  | 31.4%   | 11        |
| Fewer inpatient rehabilitation rotations                       |  | 14.3%   | 5         |
| Fewer outpatient rotations                                     |  | 77.1%   | 27        |
| Fewer interventional rotations                                 |  | 68.6%   | 24        |
| Fewer electromyography procedures                              |  | 62.9%   | 22        |
| Fewer didactic opportunities                                   |  | 31.4%   | 11        |
| Loss of electives                                              |  | 48.6%   | 17        |
| Infection with COVID-19                                        |  | 28.6%   | 10        |
| Inability to match into a competitive Fellowship               |  | 14.3%   | 5         |
| Inability to meet required number of procedures for graduation |  | 45.7%   | 16        |
| Fewer opportunities to do research in training                 |  | 17.1%   | 6         |
| Other - Write In                                               |  | 8.6%    | 3         |

### Other - Write In

### Count

|                                                                         |          |
|-------------------------------------------------------------------------|----------|
| Fewer opportunities for court side sports training, loss of US training | 1        |
| Loss of training opportunities at the end of residency                  | 1        |
| Trouble finding a job                                                   | 1        |
| <b>Totals</b>                                                           | <b>3</b> |

42. To what extent do you anticipate that your annual income will be impacted this year by the COVID- 19 pandemic?

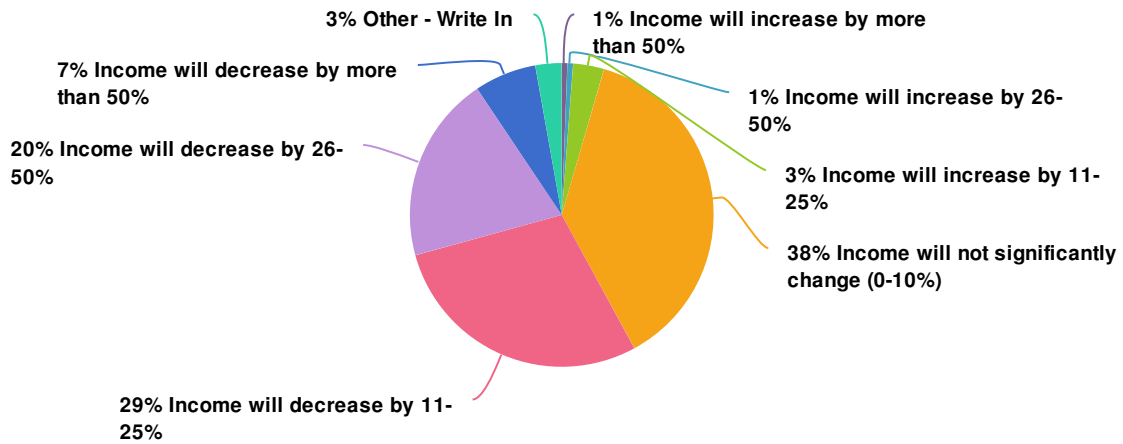

| Value                                        | Percent | Responses |
|----------------------------------------------|---------|-----------|
| Income will increase by more than 50%        | 0.6%    | 1         |
| Income will increase by 26-50%               | 0.6%    | 1         |
| Income will increase by 11-25%               | 3.3%    | 6         |
| Income will not significantly change (0-10%) | 37.6%   | 68        |
| Income will decrease by 11-25%               | 28.7%   | 52        |
| Income will decrease by 26-50%               | 19.9%   | 36        |
| Income will decrease by more than 50%        | 6.6%    | 12        |
| Other - Write In                             | 2.8%    | 5         |

Totals: 181

| Other - Write In                                                                                                                                                | Count |
|-----------------------------------------------------------------------------------------------------------------------------------------------------------------|-------|
| 100% decrease                                                                                                                                                   | 1     |
| I worked very hard and was under compensated to pay for those who did not work.                                                                                 | 1     |
| Just started new role as an attending physician so do not anticipate my salary will be impacted since my contract was negotiated and signed during the pandemic | 1     |
| No change                                                                                                                                                       | 1     |
| employee-don't know                                                                                                                                             | 1     |
| Totals                                                                                                                                                          | 5     |



43. Is there anything you feel Psychiatry added in your hospital or practice setting during the surge that was essential or unique (i.e. recharge rooms, meditation services, etc.)

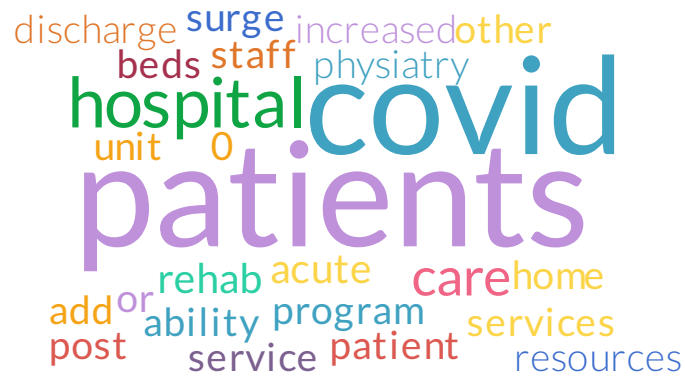

| ResponseID | Response                                                                                                                                                                                           |
|------------|----------------------------------------------------------------------------------------------------------------------------------------------------------------------------------------------------|
| 8          | n/a                                                                                                                                                                                                |
| 11         | No                                                                                                                                                                                                 |
| 13         | Encourages self treatment for those who did not want to go to physical therapy or to in person visits with me. Focus especially included thoracic and respiratory techniques in the face of COVID. |
| 15         | Took more patients and sicker patients. I did a whole second job for 5 months                                                                                                                      |
| 16         | Nope                                                                                                                                                                                               |
| 18         | yes                                                                                                                                                                                                |
| 19         | No                                                                                                                                                                                                 |
| 20         | No                                                                                                                                                                                                 |
| 21         | Physiatrist was key to coordinating a dedicated COVID-19 unit as well as logistics relating to patient care. Increased psychology services for patients/families/staffs.                           |
| 23         | No.                                                                                                                                                                                                |
| 24         | No                                                                                                                                                                                                 |
| 27         | N/a                                                                                                                                                                                                |

| ResponseID | Response                                                                                                                                                                                  |
|------------|-------------------------------------------------------------------------------------------------------------------------------------------------------------------------------------------|
| 28         | No                                                                                                                                                                                        |
| 31         | Chest therapy and proning                                                                                                                                                                 |
| 33         | Nothing, in fact the hospital took one half of the beds from the rehab unit for one month and placed acute care (non covid) patients there                                                |
| 34         | No                                                                                                                                                                                        |
| 39         | Ability to do Post-COVID clinics. This interdisciplinary practice model was much appreciated by our hospital system.                                                                      |
| 40         | Not really                                                                                                                                                                                |
| 41         | Physiatry remains an under-positioned speciality.                                                                                                                                         |
| 42         | no                                                                                                                                                                                        |
| 46         | Medical cannabis                                                                                                                                                                          |
| 49         | Daily huddle meetings                                                                                                                                                                     |
| 52         | They made us all feel safe by adding PPE's for everyone even the non clinical staff. That showed inclusion and respect.                                                                   |
| 57         | we carried the terrible load of an acute hospital that emptied out very sick and medical complex patients with insufficient staff and a skeleton crew of physicians that suffered dearly. |
| 58         | No                                                                                                                                                                                        |
| 59         | I think we provided extra help where needed on the acute side which relieved stress as well as a sounding board for discussions on how to handle the COVID-19 situation                   |
| 61         | No                                                                                                                                                                                        |
| 63         | No                                                                                                                                                                                        |
| 65         | no                                                                                                                                                                                        |
| 66         | a six week zoom meeting/class with physicians and psychiatry on different coping and self care topics                                                                                     |
| 67         | No                                                                                                                                                                                        |
| 69         | .                                                                                                                                                                                         |

## ResponseID Response

|     |                                                                                                                                                                                                                                                                                                                   |
|-----|-------------------------------------------------------------------------------------------------------------------------------------------------------------------------------------------------------------------------------------------------------------------------------------------------------------------|
| 70  | Our rehab program moved into a new hospital earlier than planned to offload the acute hospital, freeing beds for COVID units. We also accepted all the rehab inpatients from another hospital (Jackson North) to enable that hospital to convert their rehab unit to a COVID unit during the surge here in Miami. |
| 72  | Telehealth follow up visits for spinal cord patients were very beneficial for the patients and need to continue. Patients need to be able to continue to do Telehealth from their homes and we need to be able to get reimbursement equivalent to in person visits.                                               |
| 74  | No.                                                                                                                                                                                                                                                                                                               |
| 75  | No. Also, WTF is a recharge room? Our hospital is going broke and no services that fail to make money are going to float.                                                                                                                                                                                         |
| 79  | No                                                                                                                                                                                                                                                                                                                |
| 81  | We are planning to add a relaxation room but have not yet implemented this                                                                                                                                                                                                                                        |
| 82  | nothing new. Physiatry turned into an IM service to care for medically compromised patients who could not or would not go to SNF                                                                                                                                                                                  |
| 83  | people still got hurt and sick                                                                                                                                                                                                                                                                                    |
| 84  | Physiatry lobbied for direct patient care and fought to not delay care for patients in urgent need.                                                                                                                                                                                                               |
| 85  | No                                                                                                                                                                                                                                                                                                                |
| 87  | Our residency program gave us \$25 gift cards to order take-out food since we were not getting breakfast at our didactic sessions in person.                                                                                                                                                                      |
| 88  | I did not want to be in                                                                                                                                                                                                                                                                                           |
| 90  | We were an asset on the consult service due many patients suffering from disorders of consciousness or impairments due to prolonged hospitalization and/or intubation.                                                                                                                                            |
| 92  | I am not aware of resources available.                                                                                                                                                                                                                                                                            |
| 94  | continued care of pain patients via telemedicine was key                                                                                                                                                                                                                                                          |
| 96  | We had very little COVID19 in our state this spring. We are beginning to experience a surge now.                                                                                                                                                                                                                  |
| 97  | No                                                                                                                                                                                                                                                                                                                |
| 98  | More PPE                                                                                                                                                                                                                                                                                                          |
| 100 | Physiatry helped COVID patients recover sooner.                                                                                                                                                                                                                                                                   |

## ResponseID Response

---

|     |                                                                                                                                                                                                                                                                                                                                                          |
|-----|----------------------------------------------------------------------------------------------------------------------------------------------------------------------------------------------------------------------------------------------------------------------------------------------------------------------------------------------------------|
| 101 | We added designated Covid floors where we had an attending-resident team that met regularly with other members of the unit to assist with determining appropriate rehab needs and dispo. We also created a video exercise program with various levels of intensity that runs 24/7 on a hospital TV channel for patients who can self direct their rehab. |
| 102 | Nothing                                                                                                                                                                                                                                                                                                                                                  |
| 103 | Ability to find alternative and flexible solutions for patients. Physiatry is used to working with team members from other disciplines and be creative in providing care. We also spend more time looking at patient's function and factor in all aspects that may affect that: socioemotional, economic, family/friend support, etc.                    |
| 105 | daily zoom meetings from the incident command center systemwide with updates initially. than QOD, now weekly and changing to monthly next month                                                                                                                                                                                                          |
| 107 | NA freestanding                                                                                                                                                                                                                                                                                                                                          |
| 108 | Rehab to post-COVID patients. The deconditioning element, on top of cardiovascular effects, has been a big issue for survivors                                                                                                                                                                                                                           |
| 110 | No                                                                                                                                                                                                                                                                                                                                                       |
| 111 | We had beds that we could have given to acute COVID patients but they weren't needed.                                                                                                                                                                                                                                                                    |
| 112 | N/A                                                                                                                                                                                                                                                                                                                                                      |
| 113 | Reduced in house call hours, increased ability to complete work off site                                                                                                                                                                                                                                                                                 |
| 115 | free snacks                                                                                                                                                                                                                                                                                                                                              |
| 116 | None                                                                                                                                                                                                                                                                                                                                                     |
| 118 | Proning ICU patients                                                                                                                                                                                                                                                                                                                                     |
| 119 | no                                                                                                                                                                                                                                                                                                                                                       |
| 121 | care coordination, discharge planning                                                                                                                                                                                                                                                                                                                    |
| 122 | no                                                                                                                                                                                                                                                                                                                                                       |
| 124 | None                                                                                                                                                                                                                                                                                                                                                     |
| 126 | Not really in children's hospitals, or at least in my children's hospital                                                                                                                                                                                                                                                                                |

## ResponseID Response

|     |                                                                                                                                                                                                                                                                                                                                                                                                         |
|-----|---------------------------------------------------------------------------------------------------------------------------------------------------------------------------------------------------------------------------------------------------------------------------------------------------------------------------------------------------------------------------------------------------------|
| 127 | Listing of resources for wellness related to COVID-19 was distributed to faculty and residents/fellows within my department                                                                                                                                                                                                                                                                             |
| 130 | Practice closing                                                                                                                                                                                                                                                                                                                                                                                        |
| 131 | Meditation services                                                                                                                                                                                                                                                                                                                                                                                     |
| 133 | Rehab for critical patients                                                                                                                                                                                                                                                                                                                                                                             |
| 136 | Our recreation therapists provided activities that were helpful to pts across the hospital. Our assistive technology therapists helped set up the approval WiFi and iPads so it's could talk to families. Colleagues in other departments were amazed at the resources our therapists (pt/ot: all too) added. We also helped bring in an interdisciplinary approach, which seemed new to our colleagues |
| 137 | Better understanding of how critical care patients can have disability                                                                                                                                                                                                                                                                                                                                  |
| 139 | I worked in different hospital IRFs. Hospitals that provided PPE (N95) were the most helpful. I didn't see any extra services.                                                                                                                                                                                                                                                                          |
| 141 | Wound debridement                                                                                                                                                                                                                                                                                                                                                                                       |
| 143 | No                                                                                                                                                                                                                                                                                                                                                                                                      |
| 144 | no                                                                                                                                                                                                                                                                                                                                                                                                      |
| 145 | took over a dinner room and placed extra hospital beds in preparation for a surge                                                                                                                                                                                                                                                                                                                       |
| 147 | limited access to procedures                                                                                                                                                                                                                                                                                                                                                                            |
| 150 | Covid recover clinic/program                                                                                                                                                                                                                                                                                                                                                                            |
| 151 | We did COVID screening calls and helped staff the hospital during the surge                                                                                                                                                                                                                                                                                                                             |
| 152 | no                                                                                                                                                                                                                                                                                                                                                                                                      |
| 153 | No                                                                                                                                                                                                                                                                                                                                                                                                      |
| 155 | Screening questions and cleaning procedures                                                                                                                                                                                                                                                                                                                                                             |
| 156 | -maintaining patient's pain control during a time of limited patient contact providing treatments necessary for our patient's pain complaints                                                                                                                                                                                                                                                           |
| 159 | I'm doing a lot of COVID recovery and long hauler work.                                                                                                                                                                                                                                                                                                                                                 |
| 160 | manejo a pacientes no COVID                                                                                                                                                                                                                                                                                                                                                                             |

**ResponseID Response**

|     |                                                                                                                                             |
|-----|---------------------------------------------------------------------------------------------------------------------------------------------|
| 161 | We started a covid consult service to see which covid patients would benefit from inpatient rehabilitation after they recovered from covid. |
| 163 | n/a                                                                                                                                         |
| 164 | I collaborates with Case Management and Rehab (OT/PT) on strategies to get patients home from acute hospital.                               |
| 165 | n/a                                                                                                                                         |
| 166 | No                                                                                                                                          |
| 168 | No                                                                                                                                          |
| 169 | Neuro evaluation, Disposition, assess function                                                                                              |
| 170 | medication renewals and keeping outpatients out of the hospital.                                                                            |
| 171 | No                                                                                                                                          |
| 176 | no                                                                                                                                          |
| 177 | No                                                                                                                                          |
| 179 | Rehab for patients that we're deconditioned after COVID.                                                                                    |
| 180 | No                                                                                                                                          |
| 181 | No                                                                                                                                          |
| 182 | Meditation                                                                                                                                  |
| 184 | No                                                                                                                                          |
| 185 | Our program did not add anything to assist                                                                                                  |
| 188 | rehabilitation in post covid patients                                                                                                       |
| 189 | All COVID patients receive a PT visit for chest PT and relaxation exercises                                                                 |
| 191 | No                                                                                                                                          |
| 192 | Telemedicine calls                                                                                                                          |
| 194 | Unfortunately No                                                                                                                            |
| 195 | Increased inpatient consults                                                                                                                |

**ResponseID Response**

|     |                                                                                                                                                                                                                                                                                                                                                                                                                                                                                                                                                                                                                                                                                                               |
|-----|---------------------------------------------------------------------------------------------------------------------------------------------------------------------------------------------------------------------------------------------------------------------------------------------------------------------------------------------------------------------------------------------------------------------------------------------------------------------------------------------------------------------------------------------------------------------------------------------------------------------------------------------------------------------------------------------------------------|
| 199 | Telemedicine services to patient on Covid unit of our SNF and nonCoVID unit when physicians were not allowed in SNF's.                                                                                                                                                                                                                                                                                                                                                                                                                                                                                                                                                                                        |
| 200 | Recharge rooms, increased didactic time if on rotations with canceled procedures/clinics                                                                                                                                                                                                                                                                                                                                                                                                                                                                                                                                                                                                                      |
| 201 | We opened an acute COVID inpatient rehab floor for patients who were still but unsafe to discharge                                                                                                                                                                                                                                                                                                                                                                                                                                                                                                                                                                                                            |
| 202 | An MSK urgent care run by physiatrists                                                                                                                                                                                                                                                                                                                                                                                                                                                                                                                                                                                                                                                                        |
| 204 | PM&R service assisted with recommendations for discharge home for less acute patients in order to free up beds for potential surge.                                                                                                                                                                                                                                                                                                                                                                                                                                                                                                                                                                           |
| 205 | not yet                                                                                                                                                                                                                                                                                                                                                                                                                                                                                                                                                                                                                                                                                                       |
| 206 | Loss of nebulizer treatments. Streamline discharge instructions with family members<br>Interaction with family members                                                                                                                                                                                                                                                                                                                                                                                                                                                                                                                                                                                        |
| 209 | correspondence alone was very helpful                                                                                                                                                                                                                                                                                                                                                                                                                                                                                                                                                                                                                                                                         |
| 210 | -We assisted the ICU by having 2 PM&R residents as family liasons to help improve communication. -Research completed and now published on post covid outcomes                                                                                                                                                                                                                                                                                                                                                                                                                                                                                                                                                 |
| 211 | appropriate ventilation systems                                                                                                                                                                                                                                                                                                                                                                                                                                                                                                                                                                                                                                                                               |
| 212 | No                                                                                                                                                                                                                                                                                                                                                                                                                                                                                                                                                                                                                                                                                                            |
| 213 | Nothing.                                                                                                                                                                                                                                                                                                                                                                                                                                                                                                                                                                                                                                                                                                      |
| 216 | no                                                                                                                                                                                                                                                                                                                                                                                                                                                                                                                                                                                                                                                                                                            |
| 218 | Ability to document from home                                                                                                                                                                                                                                                                                                                                                                                                                                                                                                                                                                                                                                                                                 |
| 223 | Education on PPE                                                                                                                                                                                                                                                                                                                                                                                                                                                                                                                                                                                                                                                                                              |
| 224 | No, just manpower                                                                                                                                                                                                                                                                                                                                                                                                                                                                                                                                                                                                                                                                                             |
| 225 | Yes. As one of the few professions who stand up for the disabled as a minority, it was key that we continued to provide ESSENTIAL medical services throughout the entire pandemic, and ignore the implication that Physiatry is a "luxury" specialty. Our office has not missed a regular clinic day, fully staffed, to be available to assist our patients, Yet, despite the devotion by my entire staff, and their efforts to portray a strong front in implementing an example of adherence to the recommendations to limit the spread of COVID-19, we still lost one of our spinal cord patients during this pandemic. We will continue to do our best for all our patients, even with limited resources. |
| 226 | Rehabbing Covid patients                                                                                                                                                                                                                                                                                                                                                                                                                                                                                                                                                                                                                                                                                      |

**ResponseID Response**

---

228 Free Calm app for meditation and provided with laptops to be able to work from home if/when needed.

230 No

232 No

233 No

234 Not sure

236 No

238 education to other staff about disease process add to sense of calm during time of loss of control

241 Nope

242 no

245 no

247 no

249 No

251 No

252 No

253 N/A



44. How can physiatry frame itself as essential during and after pandemic?

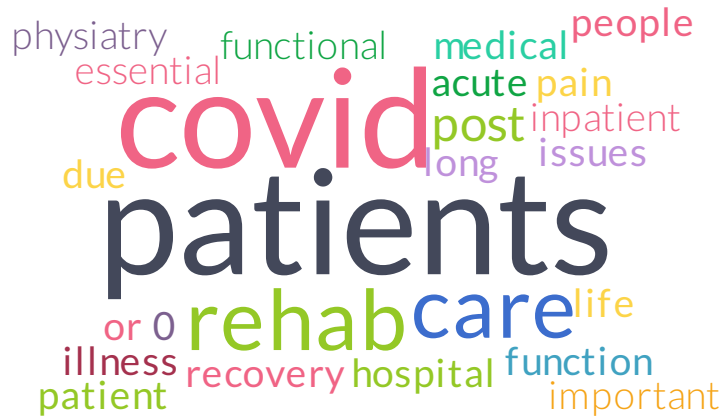

| ResponseID | Response                                                                                                                                                                                                                                       |
|------------|------------------------------------------------------------------------------------------------------------------------------------------------------------------------------------------------------------------------------------------------|
| 8          | multiple residual deficits of covid patients- endurance, neuro residual, etc                                                                                                                                                                   |
| 11         | Inpatient rehab, occupational medicine                                                                                                                                                                                                         |
| 13         | We focus on function. We can address helping people maintain optimal function in isolation, and after being ill with COVID.                                                                                                                    |
| 15         | Have flexibility. We are doctors first and pmr second. I also had to care for adults.                                                                                                                                                          |
| 16         | Make the right diagnosis, avoid surgery, avoid hospitals.                                                                                                                                                                                      |
| 18         | Both covid and non-covid patients essentially need physiatry services.                                                                                                                                                                         |
| 19         | ?                                                                                                                                                                                                                                              |
| 20         | Physiatry provides care for people with disabilities that is absolutely essential. Involvement with critically ill can minimize the long term effects of the illness.                                                                          |
| 21         | can help off load patients from acute care hospitals and provide necessary rehabilitation care to help improve patient function.                                                                                                               |
| 22         | During- helpful consultation to discharge to IPR to make more beds available for COVID patients After- Rehabilitation of critically ill patients to regain independence and avoid readmission from complications associated with the infection |
| 23         | Promote personal wellness to get through acute illnesses. Education for impaired patients on how to avoid COVID-19.                                                                                                                            |

## ResponseID Response

|    |                                                                                                                                                                                                                                                                                                                                                                                                                                                                                     |
|----|-------------------------------------------------------------------------------------------------------------------------------------------------------------------------------------------------------------------------------------------------------------------------------------------------------------------------------------------------------------------------------------------------------------------------------------------------------------------------------------|
| 24 | Stress our ability to manage conditions without surgery                                                                                                                                                                                                                                                                                                                                                                                                                             |
| 27 | Promote ARU for patients recovering from covid, aid in maintaining hospital throughput for patients transitioning to rehab, help with acute care patients as needed                                                                                                                                                                                                                                                                                                                 |
| 28 | Focus on recovery and aggressively promoting                                                                                                                                                                                                                                                                                                                                                                                                                                        |
| 30 | Identify unique and long term needs for post covid patients, ie they take longer in the IRF than current RAND numbers would indicate due to having no codes for covid                                                                                                                                                                                                                                                                                                               |
| 31 | post recovery care                                                                                                                                                                                                                                                                                                                                                                                                                                                                  |
| 32 | lrf setting is best place for post-covid patients                                                                                                                                                                                                                                                                                                                                                                                                                                   |
| 33 | Emphasize how physiatry is essential for improving quality of life                                                                                                                                                                                                                                                                                                                                                                                                                  |
| 34 | I don't no. I was the only one in my area aggressively trying to get back to doing EMG's                                                                                                                                                                                                                                                                                                                                                                                            |
| 37 | Post infection Rehabilitation                                                                                                                                                                                                                                                                                                                                                                                                                                                       |
| 39 | Helping at all levels of care where we are essential. We can see patients in acute care/ICU and ensure they have rehab. We can do EMGs and diagnose any neuromuscular issues. We can refer and care for them in IRF, LTAC, or SNF. We can follow up with them in the outpatient clinic setting to deal with any "long hauler" symptoms.                                                                                                                                             |
| 40 | Increasing post covid functionality to the respective patients                                                                                                                                                                                                                                                                                                                                                                                                                      |
| 42 | there seems to have been a lot of critical illness myopathy and/or neuropathy resulting from this                                                                                                                                                                                                                                                                                                                                                                                   |
| 46 | Whole person oriented care                                                                                                                                                                                                                                                                                                                                                                                                                                                          |
| 48 | As a medical home for patients who have had complex medical course with functional impairments, to help people recover from illness and return to a full functioning life                                                                                                                                                                                                                                                                                                           |
| 49 | Pediatric patients are not having as much long term effects as adults related to the pandemic but we are seeing an increase in violent injuries including abusive trauma/negligence and we have seen some MIS-C patients needing rehab. In summary, patients continue to have life altering diagnoses that require ongoing rehab.                                                                                                                                                   |
| 52 | Post Covid patients need rehabilitation to help with the deconditioning that happened with prolonged hospital stay. Help with strength building by getting them active again. Nutrition, skin healing with ambulation than immobility and even reduction in risks for DVT. Some need pulmonary rehab which will help with building and/ or managing pulmonary fibrosis. Helping with patients limited lung capacity, and building endurance is where rehab plays an important role. |

## ResponseID Response

|    |                                                                                                                                                                                                                                                                                                                                                                                  |
|----|----------------------------------------------------------------------------------------------------------------------------------------------------------------------------------------------------------------------------------------------------------------------------------------------------------------------------------------------------------------------------------|
| 53 | Covid pts clearly are at risk for significant functional impairment after the acute illness phase is over. We have an opportunity here to help pts manage these major functional changes, and to unburden an overstretched acute hospital system                                                                                                                                 |
| 56 | Focus on a research base for understanding and treating the sequelae of so-called "long COVID" e.g. deconditioning, cardiopulmonary complications, neurocognitive deficits, cryptogenic stroke/?ongoing risk                                                                                                                                                                     |
| 57 | good pulmonary rehab                                                                                                                                                                                                                                                                                                                                                             |
| 58 | No                                                                                                                                                                                                                                                                                                                                                                               |
| 59 | By reminding people how broad an area of expertise we cover. Many of us are rehab, pain, and neurological specialists while still being capable of treating standard acute medical patients                                                                                                                                                                                      |
| 61 | Better and faster guidance on elective procedures next time. I think the societies were slow to give guidance                                                                                                                                                                                                                                                                    |
| 63 | Emphasize our expertise on improving and returning function, pain management, and preventative measures for patients with long hospital/icu stays.                                                                                                                                                                                                                               |
| 65 | Yes , beacuse it is very important for the care of COVID patints                                                                                                                                                                                                                                                                                                                 |
| 66 | Key player in post covid rehab, Continuing to do the regular work we do                                                                                                                                                                                                                                                                                                          |
| 67 | Open up to more inpatient rehabilitation for those affected by COVID                                                                                                                                                                                                                                                                                                             |
| 69 | .                                                                                                                                                                                                                                                                                                                                                                                |
| 70 | - Establish post-COVID comprehensive care clinics for those with persistent functional impairments - Help diagnose disabling conditions in the survivors, especially neurological issues - Partner with acute care hospitals in creating future emergency plans -                                                                                                                |
| 72 | The sickest patients with COVID-19 really need Inpatient Rehab guided by a physiatrist. They have multi system issues and their rehab needs to be adjusted by a physiatrist to avoid further complications. In addition we need to do electrodiagnostic testing to evaluate pain, weakness, and numbness that the patients have due to critical illness myopathy and neuropathy. |
| 74 | Assisting with the recovery of individuals looking to regain their function and quality of life. We are essential for this.                                                                                                                                                                                                                                                      |
| 75 | Why? It either is or it isn't essential, it shouldn't need to be framed.                                                                                                                                                                                                                                                                                                         |
| 78 | Studies on how physiatry reduces complications and readmissions and how physiatry increases customer satisfaction with their medical care and followup.                                                                                                                                                                                                                          |

## ResponseID Response

|     |                                                                                                                                                                                                                                                                                                                                                                  |
|-----|------------------------------------------------------------------------------------------------------------------------------------------------------------------------------------------------------------------------------------------------------------------------------------------------------------------------------------------------------------------|
| 79  | Could help patients with physical car and mental care.                                                                                                                                                                                                                                                                                                           |
| 81  | Take a wholistic look and approach with our patients. Many of my patients are stressed, anxious and depressed which takes a toll on their physical health. We need to address all of their problems to best provide care to our patients.                                                                                                                        |
| 82  | The neurologic rehab of long haul COVID pts is an oppportunity to develop care plans and deliver both virtual and inperson rehab services                                                                                                                                                                                                                        |
| 83  | being able to address spine/msk care without procedures or surgery                                                                                                                                                                                                                                                                                               |
| 84  | We continue to be the physicians of function and education and will always be the best advocate for patient well being and maximal functioning.                                                                                                                                                                                                                  |
| 85  | In caring for the many physically deconditioned casualties of COVID-19, both in IPR and outpatient                                                                                                                                                                                                                                                               |
| 86  | its important that we become primary care for our patients.                                                                                                                                                                                                                                                                                                      |
| 87  | Physiatrists are excellent at "thinking outside the box". We pride ourselves in returning patients to optimal function, whether that's after a devastating illness and prolonged hospitalization due to COVID-19 or after an athlete is unable to participate and train as usual and needs to return to high level training while avoiding or managing injuries. |
| 88  | Sell                                                                                                                                                                                                                                                                                                                                                             |
| 90  | We have a wide skill set to help manage a lot of the sequela of covid19. Peripheral nerve issues, cardiac and pulm rehab, general debility from prolonged hospitalizations, etc                                                                                                                                                                                  |
| 92  | Providing education on exercise and improving physical and general health functions including treatment and optimization of pain conditions, impairments and disabilities.                                                                                                                                                                                       |
| 94  | --continued care of outpatients for MSK and pain, virtual PT --special rehab needs post Covid for those who do inpatient work                                                                                                                                                                                                                                    |
| 95  | Training on Inpatient Telehealth which is unique. Outpatient Telehealth does not prepare you for inpatient Telehealth.                                                                                                                                                                                                                                           |
| 96  | I'm sure we will need to work with COVID19 patients with functional deficits when out of acute care                                                                                                                                                                                                                                                              |
| 97  | Yes. We are TEAM players                                                                                                                                                                                                                                                                                                                                         |
| 98  | Follow up Covid 19 recovery                                                                                                                                                                                                                                                                                                                                      |
| 100 | Physiatry can provide essential rehabilitation services in the acute care setting - as consultants providing titrated therapy services.                                                                                                                                                                                                                          |

## ResponseID Response

|     |                                                                                                                                                                                                                                                                                                                                                                                                                                               |
|-----|-----------------------------------------------------------------------------------------------------------------------------------------------------------------------------------------------------------------------------------------------------------------------------------------------------------------------------------------------------------------------------------------------------------------------------------------------|
| 101 | By communicating with other services more and being decision makers determining when the therapy is needed and in what setting (telehealth, video, in person) we can assist with quicker discharges and reduce readmission risk.                                                                                                                                                                                                              |
| 102 | Available to meet patient demands in the long recovery process                                                                                                                                                                                                                                                                                                                                                                                |
| 103 | Physiatry is able to address multiple aspects of patient's life besides just the pathology/diagnosis. A patient's overall well-being is reviewed and physiatrist uses multi-disciplinary approach to solving these issues.                                                                                                                                                                                                                    |
| 105 | As an outpatient service seeing virtual visits as appropriate for ongoing care                                                                                                                                                                                                                                                                                                                                                                |
| 107 | Mindful of COVID related sequelea that may impact function                                                                                                                                                                                                                                                                                                                                                                                    |
| 108 | During = expertise on on managing post-ICU deconditioning, cardiovascular/pulmonary rehab focus. After = focus more on population health and "pre-hab" is keeping the population healthier                                                                                                                                                                                                                                                    |
| 109 | COVID patients are going to have functional limitations that need rehab.                                                                                                                                                                                                                                                                                                                                                                      |
| 110 | I think it is as essential now as it was before the pandemic.                                                                                                                                                                                                                                                                                                                                                                                 |
| 111 | By doing research into after effects of the virus.                                                                                                                                                                                                                                                                                                                                                                                            |
| 112 | Managemtn of chronic Post-COvid sx                                                                                                                                                                                                                                                                                                                                                                                                            |
| 113 | Patients who required extended hospital stays due to COVID-19 infection and related complications have significant medical and functional impairments that will require Physiatry specialization in order to help return to their prior functional levels.                                                                                                                                                                                    |
| 115 | substantial functional impairment and disability and prolonged recovery course in patients recovering from covid more so than with general debility after complex medical hospitalization not due to covid                                                                                                                                                                                                                                    |
| 116 | Continued effective outpatient treatment prevents the need for more emergency room and inpatient treatment need.                                                                                                                                                                                                                                                                                                                              |
| 117 | Assist in decreasing length of stay thru care coordination and decisions regarding discharge location. Assist in transitions between services settings. Help in instruction in home cares/exercise for those not requiring hospitalization. Decrease burden on surgical specialties through symptom management if operations are postponed. Help in management of post-covid symptoms, or "long haulers" through clinic setting appointments. |
| 118 | Proning teams, post COVID follow up, inpatient rehab post covid                                                                                                                                                                                                                                                                                                                                                                               |

## ResponseID Response

|     |                                                                                                                                                                                                                                                                                                                                                                                                                                                                                                                                                                                                                                                 |
|-----|-------------------------------------------------------------------------------------------------------------------------------------------------------------------------------------------------------------------------------------------------------------------------------------------------------------------------------------------------------------------------------------------------------------------------------------------------------------------------------------------------------------------------------------------------------------------------------------------------------------------------------------------------|
| 119 | For musculoskeletal care, we can help primary care with managing MSK symptoms. We will see more MSK complaints due to remote work and improper ergonomics. Also, we will continue to see rising pain complaints as pain is associated with depression and anxiety.                                                                                                                                                                                                                                                                                                                                                                              |
| 120 | Address residual issues of "long haulers"                                                                                                                                                                                                                                                                                                                                                                                                                                                                                                                                                                                                       |
| 121 | Care coordination and discharge planning                                                                                                                                                                                                                                                                                                                                                                                                                                                                                                                                                                                                        |
| 122 | Like any patient with prolonged and complicated illness, physiatry is essential to recovery. I always say we have the best job in the world. "The doctors in acute care saved your life but we will send you home."                                                                                                                                                                                                                                                                                                                                                                                                                             |
| 124 | Care for post COVID rehab needs.                                                                                                                                                                                                                                                                                                                                                                                                                                                                                                                                                                                                                |
| 125 | Importance of rehab post ICU deconditioning for patients                                                                                                                                                                                                                                                                                                                                                                                                                                                                                                                                                                                        |
| 126 | Function as the providers in a step down setting for people with COVID who can not leave the hospital and can't go to an outside SNF                                                                                                                                                                                                                                                                                                                                                                                                                                                                                                            |
| 127 | Demonstrate to others that we can accept patients with activity restrictions due to COVID-19 and improve them                                                                                                                                                                                                                                                                                                                                                                                                                                                                                                                                   |
| 131 | As physicians we can at least offload and treat medically complex patients (not COVID) to relieve other physicians first. Debility is a major long term issue that physiatrists have more knowledge with.                                                                                                                                                                                                                                                                                                                                                                                                                                       |
| 133 | Physiatry should be involved in the care of ICU patients                                                                                                                                                                                                                                                                                                                                                                                                                                                                                                                                                                                        |
| 136 | Keep getting the word out that exercise and nutrition are important. Tell the public what we do                                                                                                                                                                                                                                                                                                                                                                                                                                                                                                                                                 |
| 137 | We are the most equipped to evaluate the patients who have developed long term sequelae after hospitalization                                                                                                                                                                                                                                                                                                                                                                                                                                                                                                                                   |
| 138 | Same as prior.                                                                                                                                                                                                                                                                                                                                                                                                                                                                                                                                                                                                                                  |
| 139 | Allowing for closely monitored recovery of the COVID19 ill patients.                                                                                                                                                                                                                                                                                                                                                                                                                                                                                                                                                                            |
| 141 | I do SCI. Essentially all the bad post-Covids look externally a lot like patients with incomplete tetraplegia: weakness, vent/trach weaning, dysphagia, wounds, contractures, pain, bowel and bladder incontinence. The cognitive changes look a lot like what TBI PM&R deals with. This is exactly what PM&R is trained to do: deal with complex, multi-faceted, high burden-of-care individuals and coordinate the village it takes to get through this. Therapy, psych, nursing, nutrition; training, equipment, transition home. There was no script for guiding patients and families through what to expect, but we're used to that, too. |

## ResponseID Response

|     |                                                                                                                                                                                                                                                                                                                                                       |
|-----|-------------------------------------------------------------------------------------------------------------------------------------------------------------------------------------------------------------------------------------------------------------------------------------------------------------------------------------------------------|
| 143 | we have remained essential during this pandemic as we manage many patients with pain and do injections for those patients with significant pain and manage spinal issues that can be urgent or emergent and handle rehab needs for neuro/brain injury/trauma and even covid related rehab issues and have continued to do EMG's during this pandemic. |
| 144 | By being more flexible, nimble and adaptable to telemedicine. By being adopters of innovative ways to evaluate and engage with patients                                                                                                                                                                                                               |
| 145 | to help look at the entire picture and help set the stage for what to tackle next in the road of recovery                                                                                                                                                                                                                                             |
| 147 | no idea                                                                                                                                                                                                                                                                                                                                               |
| 150 | Super important for the long haulers                                                                                                                                                                                                                                                                                                                  |
| 151 | Provide both in and out pt rehab for post COVID patients with impaired adls and mobility                                                                                                                                                                                                                                                              |
| 153 | Instill the need to still see patients to help treat their pain and to help keep them out of the emergency room and hospitals, so we can preserve bed space and essential supplies.                                                                                                                                                                   |
| 155 | Patients in pain do not want to wait to get procedures months later or be denied medications to help with management of pain symptoms                                                                                                                                                                                                                 |
| 156 | 1) physiatry can provide necessary in patient and out patient rehabilitation services for patients who have had severe deficits following COVID- 19 infection. 2) Physiatry is part of the medical service that provides continued pain management services during COVID- 19.                                                                         |
| 159 | Well obviously we are all about recovery and reconditioning , I've been doing a lot of that kind of work                                                                                                                                                                                                                                              |
| 160 | Debe estar simultaneamente atendiendo a los pacientes desde su ingreso para prevenir la discapacidad resultante en corto tiempo y lograr el retorno a sus AVD                                                                                                                                                                                         |
| 161 | All covid patients who are admitted will require at least some rehabilitation afterwards from decompensation from being hospitalized, cardiac or pulmonary issues depending on the severity of their illness.                                                                                                                                         |
| 162 | Safe medical oversight for recovering patients who are off precautions                                                                                                                                                                                                                                                                                |
| 163 | We treat deconditioning and muscle aches.                                                                                                                                                                                                                                                                                                             |
| 164 | I honestly think many of us are not essential to a pandemic unless we're redeployed. We can help keep patients moving through the system and help with discharge strategies. There may also be a role for some recovering from severe COVID illnesses.                                                                                                |
| 165 | Important in order to manage quality of life and function of patients                                                                                                                                                                                                                                                                                 |

## ResponseID Response

166 With covid, a growing population of patients are experiencing physical effects of critical illness, including myopathy and polyneuropathies. High quality rehab is essential in allowing these individuals to return to home.

168 Focusing on continuing good examinations and focused care

169 Assessing patient functional outcomes, neuro evaluation and disposition

170 keeping non-emergency patients and services out of the hospital.

176 Chronic pain treatment

177 Be present and helpful within the acute care hospital during surges

178 After acute phase of illness, physiatry is essential in patient's recovery and functional return

179 Certainly essential in helping not only Covid patients that have suffered significant critical illness from the inpatient standpoint, but also reassuring those with MSK issues they can be worked up for acute on chronic pain using telemedicine and still receive adequate care.

180 I'm too tired to think of an answer this question/It's too soon to answer this question.

181 I assume medical care is essential.

182 Information about changes and n Medicare and Commercial payer Coding

185 COVID caused a number of sequela, namely debility, that hospitalized relatively young and healthy patients. Physiatry is essential in targeting this population as well as the more vulnerable populations to ensure musculoskeletal and cardiovascular recovery.

188 longer stays at the hospital lead to disability and functional changes. rehab specialist has a critical role in during and post syndrome

189 All hospitalized COVID patients need rehab . People working from home need ergonomic advice. I am seeing lots of periscapular pAim from poor biomechanics

191 Treating the whole patient not just systems approach

192 Not an issue in our practice

194 Can help moving patient out from the hospital more effectively

195 Medical and neuro rehab have been in demand. Improved wellness to decrease obesity as a risk factor for Covid

197 Need for recovery of function after major medical illness



## ResponseID Response

---

198 Accepting patients who did not want to go to skilled nursing facilities, or taking on patients when the hospital was not able to discharge to nursing facilities or other post acute care institutions. Helping patients recover post infection from stroke, critical illness myopathy, etc.

199 Debility amongst our elders! Helping to prevent and treat it. They aren't getting out and especially in SNF's becoming much weaker even if they didn't get CoVID

200 Remains essential for optimizing function and community/life re-integration for patients with and without COVID-19

201 Prevents morbidity from disease, may be important for new findings of myocarditis

202 Inpatient/outpatient COVID rehab, spasticity management, outpatient procedures and MSK Telehealth follow up.

204 We are the "exit door" for hospitals. Patients can come in, fill beds, overwhelm our IM colleagues, but sick patients can't "leave" the acute setting with assistance from the rehab team. The "entrance" to the hospital system has been hyper focused on historically and during Covid, but the "exit" is just as important. Covid creates the opportunity for the medical system to value our role in keeping the "flow through the exit doors" steady.... without us the entire system bottlenecks.

205 post acute care, lots of shoulder pathology, what is neuro effect and rehab needs post covid

206 Many physical deficits result from covid-19 infection other than loss of endurance. Some patients have vitamin deficiencies as consequence of altered appetite, etc

209 continue current efforts, broad and varied scope of practice

210 Rehab is a huge part of this - we knew there was going to be a big need for rehab! We can assist as we usually do in consultations, and not be stubborn in including unnecessary inperson visits, or having residents in person for no reason when there are other alternatives. It was scary to have decreases but it was not unique to us and we knew they would need to come to rehab after, so we would have our "time to shine" soon enough

211 long term sequela management especially impacting the neuro/musculoskeletal systems

212 Tele rehab?

214 Post covid patients that are hospitalized need rehab services....going to iru once covid negative I did request forming a covid positive rehab unit Which was declined by the powers that be at my hospital

216 care for pain, disability in a less exposure facility. keep out of ER, urgicare, hospital

## ResponseID Response

|     |                                                                                                                                                                                                                                                                                                                                                                                                                                                                                                                                |
|-----|--------------------------------------------------------------------------------------------------------------------------------------------------------------------------------------------------------------------------------------------------------------------------------------------------------------------------------------------------------------------------------------------------------------------------------------------------------------------------------------------------------------------------------|
| 217 | Ability to provide care involving neurology/rheumatology/sports medicine/msk and allowing more patients to be seen and treated                                                                                                                                                                                                                                                                                                                                                                                                 |
| 218 | Post covid recovery. Pulmonary therapy.                                                                                                                                                                                                                                                                                                                                                                                                                                                                                        |
| 220 | Playing a leading role in post-acute care of patients with COVID-19.                                                                                                                                                                                                                                                                                                                                                                                                                                                           |
| 221 | Rehabilitating patients after disuse myopathy from long ICU stay. Rehab of poor cardio pulmonary function after COVID 19                                                                                                                                                                                                                                                                                                                                                                                                       |
| 223 | Community education on rehab after COVID                                                                                                                                                                                                                                                                                                                                                                                                                                                                                       |
| 224 | By transferring as much of the care to telemedicine and do follow up to their patients, when times calm down make up for the lost time for didactics                                                                                                                                                                                                                                                                                                                                                                           |
| 225 | We can post data on how vulnerable our patient population is to this virus and similar illnesses. It is imperative that rehabilitation efforts persist in face of other cut-backs so that we aid our patients efforts to survive this pandemic.                                                                                                                                                                                                                                                                                |
| 226 | We are rehabbing Covid patients. That is essential                                                                                                                                                                                                                                                                                                                                                                                                                                                                             |
| 228 | Pulmonary rehab, lead in research regarding MSK or neurologic complications of the disease.                                                                                                                                                                                                                                                                                                                                                                                                                                    |
| 230 | Provide easy experience of getting patients through rehab with comprehensive inpatient to outpatient journeys                                                                                                                                                                                                                                                                                                                                                                                                                  |
| 232 | same as always, need to return to full function                                                                                                                                                                                                                                                                                                                                                                                                                                                                                |
| 233 | We will have an impact on the recovery of patients who have been hospitalized for a prolonged period to support their integration.                                                                                                                                                                                                                                                                                                                                                                                             |
| 234 | From a sports medicine perspective, I have been helping youth sports teams/organizations with return to practice/play/competition/travel protocols during the pandemic and educating them on the risks of COVID, including sequelae that non-medical people in the community may not know about, such as the cardiac manifestations we have seen in some athletes. This has been great to help build relationships and trust with youth sports organizations/teams and show them what the sports medicine side of PM&R can do. |
| 236 | Not sure                                                                                                                                                                                                                                                                                                                                                                                                                                                                                                                       |
| 238 | by addressing the long term consequences of this disease                                                                                                                                                                                                                                                                                                                                                                                                                                                                       |

## ResponseID Response

|     |                                                                                                                                                                                                                                                                                                                                                                                                                                                                                                                                                                                                                         |
|-----|-------------------------------------------------------------------------------------------------------------------------------------------------------------------------------------------------------------------------------------------------------------------------------------------------------------------------------------------------------------------------------------------------------------------------------------------------------------------------------------------------------------------------------------------------------------------------------------------------------------------------|
| 239 | rehabilitation needs are always there. as a ramification of covid in people who were NOT ill, I am now seeing functional impairments and injuries associated with decline in function and limitation of function in elderly in particular from staying home during covid. ie, more falls, associated fractures, increased debility overall with decline in function, inability to care for self at home, etc. so we are essential before, during, AND after the pandemic and it is essential for us to emphasize maintaining access to care in the spectrum of rehabilitation settings- acute, subacute, and long term. |
| 240 | Physiatry practice covers a large area: assisting in patient disposition and stratification in hospitals, providing needed diagnosis. Patients with disability continue to have needs and issues unique to Physiatry Practice                                                                                                                                                                                                                                                                                                                                                                                           |
| 241 | Focus on rehab and prehab.                                                                                                                                                                                                                                                                                                                                                                                                                                                                                                                                                                                              |
| 242 | We will need to educate on cardiac and pulmonary rehab and injuries from COVID and will need to be integral in getting patients back to their prior level of function if possible.                                                                                                                                                                                                                                                                                                                                                                                                                                      |
| 244 | We are experts on recovery after complex medical conditions. People need to recover some how and they need us to help guide that recovery.                                                                                                                                                                                                                                                                                                                                                                                                                                                                              |
| 245 | They all need rehab. We have to show how we can offload the acute services to help with rehab and open beds                                                                                                                                                                                                                                                                                                                                                                                                                                                                                                             |
| 246 | The significant debility associated with extended hospital stays for those severely affected by COVID-19 makes our specialty invaluable to the current and future pandemics. We should continue to raise awareness about how our specialty has made a significant contribution to those most severely affected.                                                                                                                                                                                                                                                                                                         |
| 247 | with pos covid patients                                                                                                                                                                                                                                                                                                                                                                                                                                                                                                                                                                                                 |
| 249 | Unsure                                                                                                                                                                                                                                                                                                                                                                                                                                                                                                                                                                                                                  |
| 251 | Improving patient function after a COVID illness, non-operative option for MSK and spine management when surgery is not possible                                                                                                                                                                                                                                                                                                                                                                                                                                                                                        |
| 252 | Importance to patients' quality of life.                                                                                                                                                                                                                                                                                                                                                                                                                                                                                                                                                                                |
| 253 | People who get sick often have rehab needs (whether it's IPR vs pain management vs diagnostic evaluations)                                                                                                                                                                                                                                                                                                                                                                                                                                                                                                              |
| 255 | The effects of the virus are not known long term but have been shown to cause functional declines acutely with likely lasting effects, and there is no other specialty trained and equipped for that. As people often say, "Surgeons (or critical care physicians in this case) may save their lives; we give them your lives back."                                                                                                                                                                                                                                                                                    |
| 256 | most patients coming out of COVID need rehab due to increased weakness, fatigue, decreased function.                                                                                                                                                                                                                                                                                                                                                                                                                                                                                                                    |



45. What would you prefer to be called, if any term was available? - Text Analysis

No data to display
